# Supplementary material for: Multi-omic and multi-species meta-analyses of nicotine consumption
Source: PubMed Central journal article supplement (PMC7862377; doi:10.1038/s41398-021-01231-y), 2021-02-04
Supplement: 41398_2021_1231_MOESM2_ESM.pdf [file 41398_2021_1231_MOESM2_ESM.pdf]

Supplementary Table 1. Jaccard Similarity Estimates Across Identified gene sets

| Gene set                         | Jaccard Similarity Estimate |                 |                 |          |   |  |
|----------------------------------|-----------------------------|-----------------|-----------------|----------|---|--|
| Merged Kily et al. <sup>30</sup> | 1                           |                 |                 |          |   |  |
| Merged Wang et al. <sup>29</sup> | 6.00E-03                    | 1               |                 |          |   |  |
| Chen et al. <sup>27</sup>        | 0.00E+00                    | <b>1.59E-02</b> | 1               |          |   |  |
| Sharp et al. <sup>31</sup>       | 3.30E-03                    | 3.50E-03        | 5.40E-03        | 1        |   |  |
| Polesskaya et al. <sup>28</sup>  | 5.50E-03                    | <b>8.80E-03</b> | <b>8.10E-03</b> | 0.00E+00 | 1 |  |

Note: Gene sets shown do not exactly align with the full complement of GeneWeaver set IDs shown in Table 1 as several sets (within studies) were merged to reduce overrepresentation of genes in a given study. Bolded values indicate  $p < 0.05$ .

Supplementary Table 2. Replicated Genes Across Gene Weaver Studies

| GENE_NAME | STUDY | SPECIES | BEHAVIOR_1             | BRAIN_REGION_1             | STUDY_2        | SPECIES_2 | BEHAVIOR_2             | BRAIN_REGION_2     |
|-----------|-------|---------|------------------------|----------------------------|----------------|-----------|------------------------|--------------------|
| ACTB      | Wang  | mouse   | Nic_Self-Admin         | Amyg_Hipp_nAcc_PF<br>C_VTA | Chen           | mouse     | Acute_Nic              | VTA                |
| ALDH7A1   | Sharp | rat     | Chronic_Nic_Self-Admin | nAcc                       | Kily           | fish      | Nic_CPP                | Whole_Brain        |
| CCT3      | Wang  | mouse   | Nic_Self-Admin         | Amyg_Hipp_nAcc_PF<br>C_VTA | Polesska<br>ya | rat       | Chronic_Nic_Treatment  | PFC_vStriatum_Hipp |
| DSTN      | Wang  | mouse   | Nic_Self-Admin         | Amyg_Hipp_nAcc_PF<br>C_VTA | Sharp          | rat       | Chronic_Nic_Self-Admin | nAcc               |
| GABBR1    | Wang  | mouse   | Nic_Self-Admin         | Amyg_Hipp_nAcc_PF<br>C_VTA | Chen           | mouse     | Acute_Nic              | VTA                |
| ITPR2     | Wang  | mouse   | Nic_Self-Admin         | Amyg_Hipp_nAcc_PF<br>C_VTA | Chen           | mouse     | Acute_Nic              | VTA                |
| KCNK1     | Wang  | mouse   | Nic_Self-Admin         | Amyg_Hipp_nAcc_PF<br>C_VTA | Polesska<br>ya | rat       | Chronic_Nic_Treatment  | PFC_vStriatum_Hipp |
| KRT5      | Kily  | fish    | Nic_CPP                | Whole_Brain                | Polesska<br>ya | rat       | Chronic_Nic_Treatment  | PFC_vStriatum_Hipp |
| MOBP      | Wang  | mouse   | Nic_Self-Admin         | Amyg_Hipp_nAcc_PF<br>C_VTA | Chen           | mouse     | Acute_Nic              | VTA                |
| PPM1B     | Kily  | fish    | Nic_CPP                | Whole_Brain                | Chen           | mouse     | Acute_Nic              | VTA                |
| PRKACB    | Chen  | mouse   | Acute_Nic              | VTA                        | Polesska<br>ya | rat       | Chronic_Nic_Treatment  | PFC_vStriatum_Hipp |
| PSEN1     | Wang  | mouse   | Nic_Self-Admin         | Amyg_Hipp_nAcc_PF<br>C_VTA | Polesska<br>ya | rat       | Chronic_Nic_Treatment  | PFC_vStriatum_Hipp |
| PSMB5     | Wang  | mouse   | Nic_Self-Admin         | Amyg_Hipp_nAcc_PF<br>C_VTA | Chen           | mouse     | Acute_Nic              | VTA                |
| PSMD7     | Wang  | mouse   | Nic_Self-Admin         | Amyg_Hipp_nAcc_PF<br>C_VTA | Sharp          | rat       | Chronic_Nic_Self-Admin | nAcc               |

|       |       |       |                        |                            |                |       |                        |                    |
|-------|-------|-------|------------------------|----------------------------|----------------|-------|------------------------|--------------------|
| RAD21 | Sharp | rat   | Chronic_Nic_Self-Admin | nAcc                       | Chen           | mouse | Acute_Nic              | VTA                |
| RPS28 | Wang  | mouse | Nic_Self-Admin         | Amyg_Hipp_nAcc_PF<br>C_VTA | Sharp          | rat   | Chronic_Nic_Self-Admin | nAcc               |
| SST   | Wang  | mouse | Nic_Self-Admin         | Amyg_Hipp_nAcc_PF<br>C_VTA | Chen           | mouse | Acute_Nic              | VTA                |
| SYT4  | Wang  | mouse | Nic_Self-Admin         | Amyg_Hipp_nAcc_PF<br>C_VTA | Chen           | mouse | Acute_Nic              | VTA                |
| TFDP1 | Wang  | mouse | Nic_Self-Admin         | Amyg_Hipp_nAcc_PF<br>C_VTA | Kily           | fish  | Nic_CPP                | Whole_Brain        |
| UCHL1 | Wang  | mouse | Nic_Self-Admin         | Amyg_Hipp_nAcc_PF<br>C_VTA | Polesska<br>ya | rat   | Chronic_Nic_Treatment  | PFC_vStriatum_Hipp |
| YWHAG | Wang  | mouse | Nic_Self-Admin         | Amyg_Hipp_nAcc_PF<br>C_VTA | Chen           | mouse | Acute_Nic              | VTA                |

Table showing the two studies (study 1 and study 2) in GeneWeaver for which a gene was observed to be differentially expressed across two brain tissues (brain region 1/2) for varying smoking/nicotine exposure experimental paradigms.

### Supplementary Figure 1 Candidate Gene-Based Tests for Human Tobacco Consumption

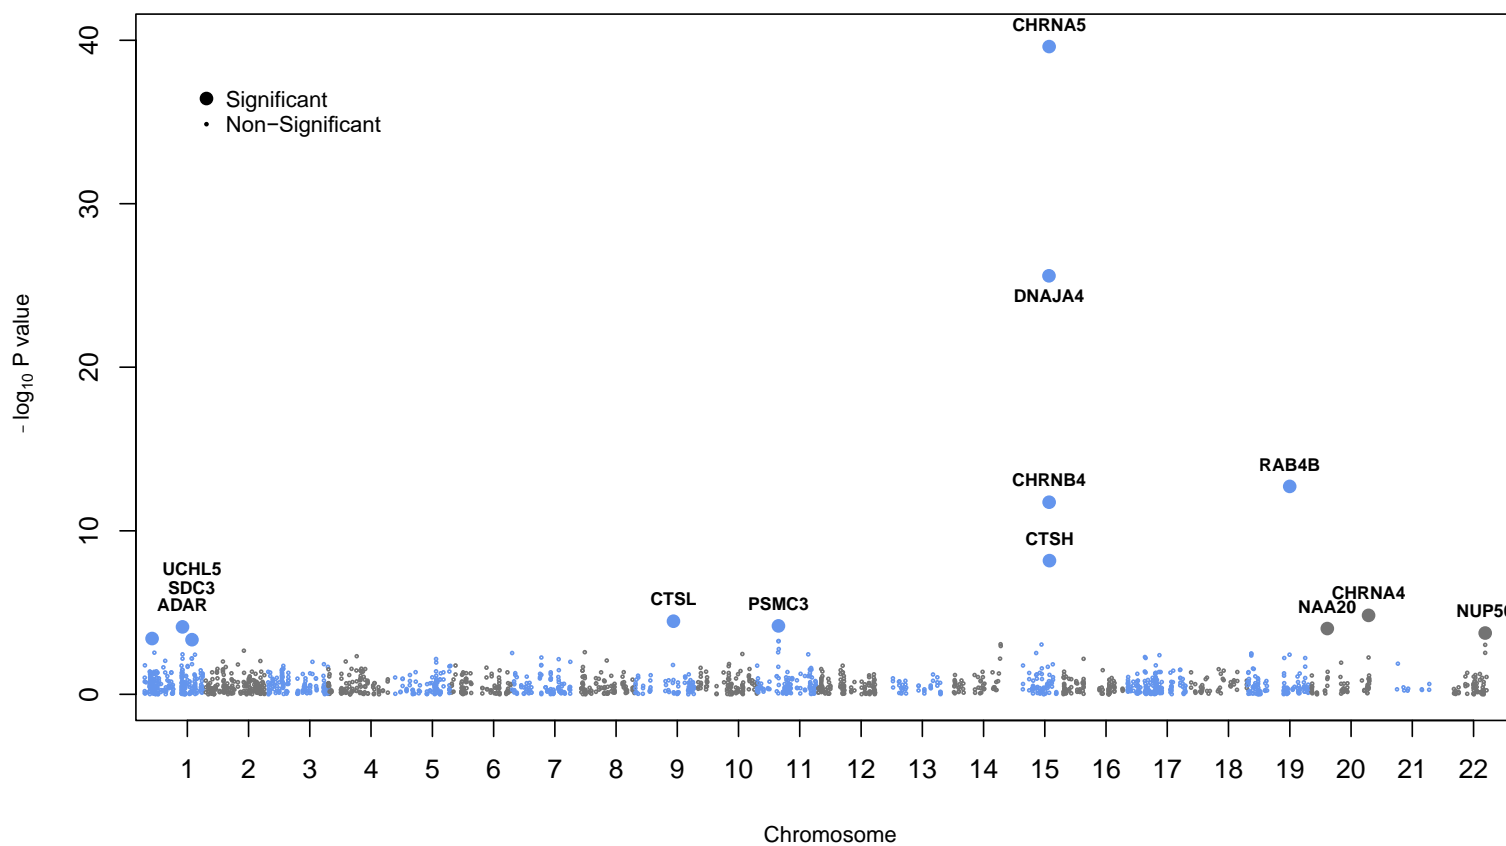

This figure shows the results of the associations of the model organisms nicotine genes via three gene-based tests (MAGMA, H-MAGMA, MultiXcan). Significant genes were required to survive a false discovery rate  $< 0.05$  ( $padj < 0.05$ ).

## Supplementary Figure 2 Genetic Signal of Human Tobacco Consumption from (Model Organisms) Nicotine Genes

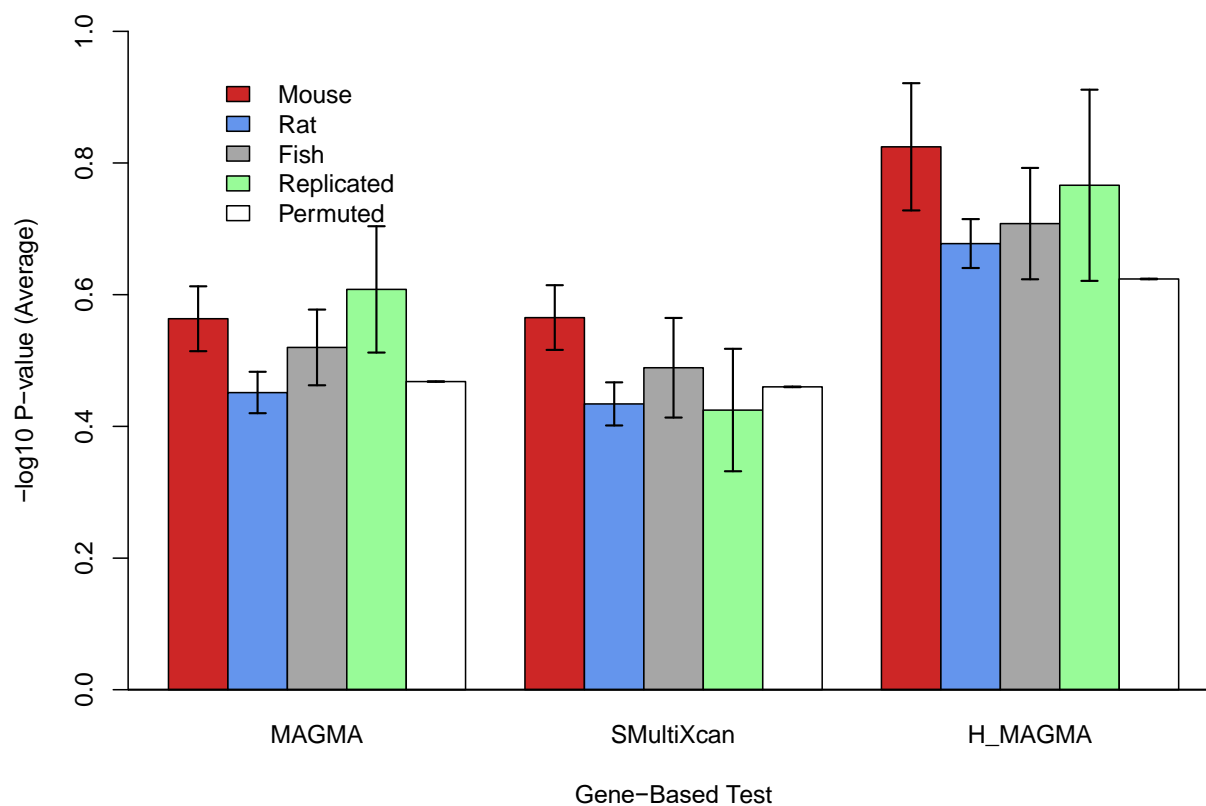

*Note:* we performed a one-way analysis of variance (ANOVA) to test whether differences existed between species, replicated genes (21 genes associated with nicotine exposure across studies) and a random list of permuted genes (permuted 500 non-model organism genes 10,000 times). Our ANOVA suggested that genes from mouse studies were more associated with human tobacco consumption than rat and fish studies and also than random (permuted) genes ( $p < 0.05$ ).

**Supplementary Table 3** Model Organism Based Polygenic Score Predicting Human Tobacco Consumption

| Polygenic Score Predicting Cigarettes Per Day in European Ancestry Add Health Participants |         |       |         |          |            |
|--------------------------------------------------------------------------------------------|---------|-------|---------|----------|------------|
|                                                                                            | $\beta$ | S.E.  | Z Score | P-value  | N Variants |
| Model Organism Genes (Protein Coding Regions)                                              | 0.079   | 0.027 | 2.884   | 0.004*   | 81453      |
| Model Organism Genes (Surrounding Regions 10 kB)                                           | -0.023  | 0.028 | -0.840  | 0.401    | 21288      |
| All Other Variants                                                                         | 0.164   | 0.025 | 6.669   | < 0.001* | 4554197    |
| All Variants                                                                               | 0.174   | 0.024 | 7.725   | < 0.001* | 4656938    |

Note we fit two polygenic risk score models - one consisting of all variants and one model with multiple components (protein coding genes, surrounding regions, all other variants). Each model controlled for demographics and six principle components.

\*  $p < .05$
