# Supplementary material for: Multi-omic and multi-species meta-analyses of nicotine consumption
Source: Transl Psychiatry. 2021 Feb 4;11:98. doi: 10.1038/s41398-021-01231-y (PMC7862377; doi:10.1038/s41398-021-01231-y)
Supplement: Supplementary file 3 — Supplementary File 1. MAGMA Summary Statistics File [file 41398_2021_1231_MOESM3_ESM.pdf]

## MAGMA Gene Based Test of Human Cigarettes per Day

| SYMBOL        | GENE            | CHR | START | STOP      | NSNPS     | NPARAM | N         | ZSTAT  | P      | Padj                               |                        |
|---------------|-----------------|-----|-------|-----------|-----------|--------|-----------|--------|--------|------------------------------------|------------------------|
| HYKK          | ENSG00000188266 | 15  |       | 78789906  | 78839714  | 41     | 4         | 123834 | 7.9347 | 1.05E-15 2.00E-11                  |                        |
| EGLN2         | ENSG00000269858 | 19  |       | 41294901  | 41324338  | 50     | 10        | 123834 | 7.8387 | 2.28E-15 2.17E-11                  |                        |
| CHRNA3        | ENSG00000080644 | 15  |       | 78875394  | 78923637  | 71     | 6         | 123834 | 7.6226 | 1.24E-14 7.86E-11                  |                        |
| IREB2         | ENSG00000136381 | 15  |       | 78719773  | 78803798  | 115    | 8         | 123834 | 7.3726 | 8.37E-14 3.09E-10                  |                        |
| CTC-490E21.12 | ENSG00000268797 | 19  |       | 41297202  | 41414187  | 249    | 29        | 123834 | 7.3716 | 8.43E-14 3.09E-10                  |                        |
| RAB4B-EGLN2   | ENSG00000171570 | 19  |       | 41274147  | 41324103  | 94     | 13        | 123834 | 7.3521 | 9.75E-14 3.09E-10                  |                        |
| RAB4B         | ENSG00000167578 | 19  |       | 41274121  | 41312847  | 83     | 12        | 123834 | 7.2595 | 1.94E-13 5.27E-10                  |                        |
| CHRNA4        | ENSG00000117971 | 15  |       | 78906461  | 79030096  | 168    | 16        | 123834 | 6.954  | 1.78E-12 4.23E-09                  |                        |
| ADAMTS7       | ENSG00000136378 | 15  |       | 79041545  | 79113773  | 124    | 10        | 123834 | 6.8971 | 2.65E-12 5.60E-09                  |                        |
| MTA-RAB4B     | ENSG00000268975 | 19  |       | 41267553  | 41302590  | 77     | 10        | 123834 | 6.4346 | 6.19E-11 1.18E-07                  |                        |
| PSMA4         | ENSG00000041357 | 15  |       | 78822747  | 78851604  | 42     | 2         | 123834 | 6.1094 | 5.00E-10 7.31E-07                  |                        |
| CHRNA5        | ENSG00000169684 | 15  |       | 78847862  | 78897611  | 61     | 6         | 123834 | 6.1094 | 5.00E-10 7.31E-07                  |                        |
| CYP2A6        | ENSG00000255974 | 19  |       | 41339443  | 41366352  | 53     | 10        | 123834 | 6.1094 | 5.00E-10 7.31E-07                  |                        |
| AC027228.1    | ENSG00000268838 | 15  |       | 78820023  | 78841288  | 28     | 2         | 123834 | 5.9807 | 1.11E-09 1.51E-06                  |                        |
| MORF4L1       | ENSG00000185787 | 15  |       | 79092829  | 79200475  | 254    | 11        | 123834 | 5.8091 | 3.14E-09 3.98E-06                  |                        |
| CHRNA6        | ENSG00000147434 | 8   |       | 42597763  | 42661535  | 71     | 6         | 123834 | 5.6153 | 9.81E-09 1.17E-05                  |                        |
| MTA           | ENSG00000261857 | 19  |       | 41267553  | 41293395  | 51     | 7         | 123834 | 5.2572 | 7.31E-08 8.17E-05                  |                        |
| C19orf54      | ENSG00000188493 | 19  |       | 41236761  | 41267458  | 34     | 6         | 123834 | 5.1839 | 1.09E-07 0.000115104               |                        |
| SNRPA         | ENSG00000077312 | 19  |       | 41246542  | 41281294  | 43     | 7         | 123834 | 5.1451 | 1.34E-07 0.000134056               |                        |
| BAI2          | ENSG00000121753 | 1   |       | 32182718  | 32240494  | 25     | 4         | 123834 | 4.8857 | 5.15E-07 0.000489456               |                        |
| NUMBL         | ENSG00000105245 | 19  |       | 41162596  | 41206877  | 65     | 11        | 123834 | 4.7245 | 1.15E-06 0.001040914               |                        |
| CXXC4         | ENSG00000168772 | 4   |       | 105379469 | 105426058 |        | 16        | 3      | 123834 | 4.4795                             | 3.74E-06 0.00323136    |
| LTPB4         | ENSG00000090006 | 19  |       | 41088789  | 41145725  | 76     | 8         | 123834 | 4.4152 | 5.05E-06 0.00408672                |                        |
| CYP2A7        | ENSG00000198077 | 19  |       | 41371344  | 41398657  | 91     | 7         | 123834 | 4.4105 | 5.16E-06 0.00408672                |                        |
| CHRNA3        | ENSG00000147432 | 8   |       | 42542519  | 42602550  | 145    | 6         | 123834 | 4.326  | 7.59E-06 0.005770829               |                        |
| CHRNA4        | ENSG00000101204 | 20  |       | 61965420  | 62019753  | 136    | 27        | 123834 | 4.1757 | 1.49E-05 0.010893046               |                        |
| ITPKC         | ENSG00000086544 | 19  |       | 41213008  | 41256765  | 68     | 9         | 123834 | 4.1494 | 1.67E-05 0.0117568                 |                        |
| AL049840.1    | ENSG00000224997 | 14  |       | 104167607 |           |        | 104189149 | 18     | 5      | 123834 3.9803 3.44E-05 0.023268414 |                        |
| ADCK4         | ENSG00000123815 | 19  |       | 41187434  | 41234112  | 71     | 10        | 123834 | 3.9727 | 3.55E-05 0.023268414               |                        |
| XRCC3         | ENSG00000126215 | 14  |       | 104153946 | 104191841 |        | 42        | 8      | 123834 | 3.83                               | 6.41E-05 0.04061376    |
| GTF2I         | ENSG00000077809 | 7   |       | 74061994  | 74185026  | 82     | 9         | 123834 | 3.8177 | 6.74E-05 0.041327071               |                        |
| CA14          | ENSG00000118298 | 1   |       | 150219554 | 150247478 |        | 2         | 1      | 123834 | 3.714                              | 0.00010198 0.06057612  |
| APH1A         | ENSG00000117362 | 1   |       | 150227804 | 150251980 |        | 4         | 1      | 123834 | 3.6752                             | 0.00011881 0.06843456  |
| ZNF280D       | ENSG00000137871 | 15  |       | 56912379  | 57220769  | 379    | 16        | 123834 | 3.6336 | 0.00013976 0.077335406             |                        |
| CLU           | ENSG00000120885 | 8   |       | 27444434  | 27482548  | 39     | 8         | 123834 | 3.6288 | 0.0001424 0.077335406              |                        |
| MFS1D10       | ENSG00000109736 | 4   |       | 2922288   | 2946586   | 23     | 7         | 123834 | 3.618  | 0.00014846 0.077406425             |                        |
| MYD88         | ENSG00000172936 | 3   |       | 38169969  | 38194513  | 21     | 3         | 123834 | 3.6112 | 0.00015238 0.077406425             |                        |
| CHMP1A        | ENSG00000131165 | 16  |       | 89700839  | 89734253  | 76     | 9         | 123834 | 3.6063 | 0.00015529 0.077406425             |                        |
| C1orf54       | ENSG00000118292 | 1   |       | 150230600 | 150263327 |        | 7         | 1      | 123834 | 3.6005                             | 0.00015882 0.077406425 |
| BNC2          | ENSG00000173068 | 9   |       | 16399501  | 16880841  | 773    | 49        | 123834 | 3.5748 | 0.00017523 0.082647711             |                        |
| ADD1          | ENSG00000087274 | 4   |       | 2835584   | 2941803   | 63     | 9         | 123834 | 3.5703 | 0.00017827 0.082647711             |                        |
| ZBTB7A        | ENSG00000178951 | 19  |       | 4034362   | 4076943   | 45     | 8         | 123834 | 3.5606 | 0.00018504 0.083652882             |                        |
| RAPSN         | ENSG00000165917 | 11  |       | 47449308  | 47480730  | 72     | 7         | 123834 | 3.5546 | 0.00018924 0.083652882             |                        |
| SPATA33       | ENSG00000167523 | 16  |       | 89714210  | 89747680  | 71     | 9         | 123834 | 3.5228 | 0.00021352 0.09224064              |                        |
| AC015688.3    | ENSG00000266728 | 17  |       | 25940390  | 25977803  | 10     | 4         | 123834 | 3.4828 | 0.00024813 0.104810112             |                        |
| C16orf3       | ENSG00000221819 | 16  |       | 90085316  | 90106309  | 40     | 8         | 123834 | 3.4569 | 0.00027318 0.112882727             |                        |
| SHKBP1        | ENSG00000160410 | 19  |       | 41072757  | 41107305  | 35     | 9         | 123834 | 3.4174 | 0.00031612 0.127846999             |                        |
| AK5           | ENSG00000154027 | 1   |       | 77737736  | 78035651  | 748    | 64        | 123834 | 3.3875 | 0.0003527 0.136834325              |                        |
| ZFYVE21       | ENSG00000100711 | 14  |       | 104172067 | 104210005 |        | 21        | 6      | 123834 | 3.3874                             | 0.00035274 0.136834325 |
| DHX40         | ENSG00000108406 | 17  |       | 57632886  | 57695706  | 32     | 3         | 123834 | 3.3638 | 0.00038436 0.146118298             |                        |
| KB-1980E6.3   | ENSG00000253633 | 8   |       | 103530968 |           |        | 103560896 | 94     | 15     | 123834 3.3125 0.00046227           |                        |
|               | 0.16409088      |     |       |           |           |        |           |        |        |                                    |                        |
| SPATA2L       | ENSG00000158792 | 16  |       | 89752751  | 89778113  | 26     | 6         | 123834 | 3.3096 | 0.0004671 0.16409088               |                        |
| ACAA1         | ENSG00000060971 | 3   |       | 38134620  | 38188733  | 38     | 7         | 123834 | 3.3088 | 0.00046848 0.16409088              |                        |
| AC016586.1    | ENSG00000205147 | 19  |       | 4031127   | 4053154   | 29     | 4         | 123834 | 3.3086 | 0.00046885 0.16409088              |                        |
| PEP1          | ENSG00000015413 | 16  |       | 89669716  | 89714839  | 56     | 12        | 123834 | 3.3051 | 0.0004748 0.16409088               |                        |
| SLC39A14      | ENSG00000104635 | 8   |       | 22214762  | 22301642  | 194    | 13        | 123834 | 3.2838 | 0.00051217 0.173845131             |                        |
| PSMC3         | ENSG00000165916 | 11  |       | 47430320  | 47457993  | 65     | 6         | 123834 | 3.2578 | 0.00056141 0.187215461             |                        |
| 10-Mar        | ENSG00000173838 | 17  |       | 60768675  | 60895705  | 154    | 19        | 123834 | 3.2521 | 0.00057286 0.18774005              |                        |
| SLC22A14      | ENSG00000144671 | 3   |       | 38313785  | 38370066  | 144    | 6         | 123834 | 3.2386 | 0.00060065 0.193155004             |                        |
| NPSR1         | ENSG00000187258 | 7   |       | 34687851  | 34927944  | 559    | 32        | 123834 | 3.2317 | 0.00061532 0.193155004             |                        |
| TRMT61A       | ENSG00000166166 | 14  |       | 103985521 | 104013410 |        | 12        | 3      | 123834 | 3.228                              | 0.00062321 0.193155004 |
| SALL1         | ENSG00000103449 | 16  |       | 51159886  | 51195278  | 19     | 4         | 123834 | 3.2249 | 0.00063003 0.193155004             |                        |
| POM121C       | ENSG00000135213 | 7   |       | 75036066  | 75125548  | 97     | 15        | 123834 | 3.2145 | 0.00065344 0.197152183             |                        |
| DCDC1         | ENSG00000170959 | 11  |       | 30841916  | 31401357  | 449    | 17        | 123834 | 3.1554 | 0.00080138 0.23800986              |                        |
| ZACN          | ENSG00000186919 | 17  |       | 74058042  | 74089747  | 29     | 2         | 123834 | 3.1489 | 0.00081939 0.23925888              |                        |
| MAP2K6        | ENSG00000108984 | 17  |       | 67400839  | 67549472  | 108    | 18        | 123834 | 3.1449 | 0.00083076 0.23925888              |                        |
| DBNDD1        | ENSG00000003249 | 16  |       | 90061273  | 90096536  | 70     | 11        | 123834 | 3.1221 | 0.00089779 0.254704363             |                        |
| WWP2          | ENSG00000198373 | 16  |       | 69786209  | 69985644  | 346    | 18        | 123834 | 3.1123 | 0.00092802 0.259408885             |                        |
| NUF50         | ENSG00000093000 | 22  |       | 45549722  | 45593896  | 97     | 7         | 123834 | 3.108  | 0.00094181 0.259448181             |                        |
| FNDC5         | ENSG00000160097 | 1   |       | 33317869  | 33348083  | 24     | 5         | 123834 | 3.0924 | 0.00099265 0.268356                |                        |
| EPHA3         | ENSG00000044524 | 3   |       | 89146674  | 89541284  | 480    | 21        | 123834 | 3.0894 | 0.0010027 0.268356                 |                        |
| NOP14         | ENSG00000087269 | 4   |       | 2929660   | 2975112   | 61     | 7         | 123834 | 3.0854 | 0.0010165 0.268356                 |                        |
| GRK4          | ENSG00000125388 | 4   |       | 2955335   | 3052474   | 220    | 15        | 123834 | 3.0672 | 0.0010804 0.2813184                |                        |
| GAS8          | ENSG00000141013 | 16  |       | 90076037  | 90121383  | 86     | 12        | 123834 | 3.0628 | 0.0010963 0.281600951              |                        |
| CKB           | ENSG00000166165 | 14  |       | 103975996 | 103999448 |        | 24        | 4      | 123834 | 3.0562                             | 0.0011208 0.284055552  |
| USP43         | ENSG00000154914 | 17  |       | 9538015   | 9643008   | 111    | 14        | 123834 | 3.0386 | 0.0011883 0.297200084              |                        |
| CYP2B6        | ENSG00000197408 | 19  |       | 41487204  | 41534303  | 114    | 11        | 123834 | 3.032  | 0.0012145 0.299808                 |                        |
| C1orf51       | ENSG00000159208 | 1   |       | 150244953 | 150269505 |        | 18        | 4      | 123834 | 3.0197                             | 0.001265 0.308270769   |
| SETD1A        | ENSG00000099381 | 16  |       | 30958615  | 31006437  | 31     | 3         | 123834 | 3.0046 | 0.0013298 0.31983336               |                        |
| LGALS9        | ENSG00000168961 | 17  |       | 25946824  | 25986586  | 26     | 4         | 123834 | 3.0009 | 0.0013461 0.31983336               |                        |
| EXOC7         | ENSG00000182473 | 17  |       | 74067087  | 74127657  | 66     | 5         | 123834 | 2.964  | 0.0015181 0.351761143              |                        |
| S100BPB       | ENSG00000116497 | 1   |       | 33272368  | 33334476  | 62     | 7         | 123834 | 2.9629 | 0.0015238 0.351761143              |                        |
| ING2          | ENSG00000168556 | 4   |       | 184416147 | 184442249 |        | 45        | 9      | 123834 | 2.9596                             | 0.0015403 0.351761143  |
| PLCH1         | ENSG00000114805 | 3   |       | 155083369 | 155472856 |        | 691       | 26     | 123834 | 2.9568                             | 0.0015545 0.351761143  |
| ZNF521        | ENSG00000198795 | 18  |       | 22631890  | 22942154  | 389    | 50        | 123834 | 2.9412 | 0.0016347 0.365557384              |                        |
| HSD3B7        | ENSG00000099377 | 16  |       | 30986519  | 31010473  | 10     | 2         | 123834 | 2.9275 | 0.0017087 0.37332149               |                        |
| AC135048.1    | ENSG00000268863 | 16  |       | 30986808  | 31007533  | 10     | 2         | 123834 | 2.9275 | 0.0017087 0.37332149               |                        |
| CELF1         | ENSG00000149187 | 11  |       | 47477496  | 47597121  | 90     | 12        | 123834 | 2.9217 | 0.0017405 0.375948                 |                        |
| SYNDIG1L      | ENSG00000183379 | 14  |       | 74862596  | 74902805  | 48     | 9         | 123834 | 2.917  | 0.001767 0.377383551               |                        |
| SPP1          | ENSG00000118785 | 4   |       | 88886819  | 88914562  | 26     | 4         | 123834 | 2.9091 | 0.0018124 0.377494748              |                        |
| CHDH          | ENSG0000016391  | 3   |       | 53836362  | 53890417  | 72     | 17        | 123834 | 2.9073 | 0.0018231 0.377494748              |                        |
| TCF4          | ENSG00000196628 | 18  |       | 52879562  | 53342018  | 441    | 37        | 123834 | 2.9066 | 0.0018271 0.377494748              |                        |
| N5DC2         | ENSG00000168268 | 3   |       | 52548386  | 52579070  | 43     | 6         | 123834 | 2.9018 | 0.0018553 0.379199381              |                        |
| OXSRI         | ENSG00000172939 | 3   |       |           |           |        |           |        |        |                                    |                        |

|              |                  |    |           |           |     |     |        |        |           |             |             |
|--------------|------------------|----|-----------|-----------|-----|-----|--------|--------|-----------|-------------|-------------|
| ORAI3        | ENSG00000175938  | 16 | 30950387  | 30977782  | 13  | 3   | 123834 | 2.8837 | 0.0019654 | 0.385137353 |             |
| ADTRP        | ENSG00000111863  | 6  | 11702287  | 11817279  | 190 | 27  | 123834 | 2.8771 | 0.002007  | 0.389276082 |             |
| CDK10        | ENSG00000185324  | 16 | 89737145  | 89772772  | 45  | 6   | 123834 | 2.8718 | 0.0020409 | 0.3918528   |             |
| TRIB3        | ENSG00000101255  | 20 | 351261    | 388203    | 24  | 7   | 123834 | 2.8654 | 0.0020824 | 0.395822592 |             |
| TAL2         | ENSG00000186051  | 9  | 108414738 | 108435367 |     | 25  | 4      | 123834 | 2.8602    | 0.002117    | 0.396831237 |
| AC005493.1   | ENSG00000214841  | 7  | 34675709  | 34709772  | 111 | 14  | 123834 | 2.8578 | 0.0021332 | 0.396831237 |             |
| NFIB         | ENSG00000147862  | 9  | 14071842  | 14408982  | 168 | 44  | 123834 | 2.8502 | 0.0021844 | 0.396831237 |             |
| FBXL19       | ENSG00000099364  | 16 | 30924376  | 30970104  | 37  | 4   | 123834 | 2.8495 | 0.0021894 | 0.396831237 |             |
| KLC1         | ENSG00000126214  | 14 | 104018233 | 104177888 |     | 255 | 13     | 123834 | 2.8486    | 0.0021956   | 0.396831237 |
| STAB1        | ENSG00000010327  | 3  | 52519354  | 52568511  | 46  | 7   | 123834 | 2.8448 | 0.0022223 | 0.396831237 |             |
| NKX2-1       | ENSG00000136352  | 14 | 36975602  | 37000354  | 19  | 4   | 123834 | 2.8408 | 0.0022498 | 0.396831237 |             |
| RP11-36817.4 | ENSG00000260259  | 16 | 89739028  | 89762977  | 42  | 5   | 123834 | 2.8399 | 0.0022565 | 0.396831237 |             |
| NALCN        | ENSG00000102452  | 13 | 101696130 | 102078843 |     | 752 | 58     | 123834 | 2.8372    | 0.0022756   | 0.396831237 |
| C4orf6       | ENSG00000082929  | 4  | 5516296   | 5539528   | 39  | 4   | 123834 | 2.831  | 0.0023203 | 0.40094784  |             |
| SOD1         | ENSG00000142168  | 21 | 33021935  | 33051244  | 36  | 6   | 123834 | 2.8232 | 0.0023777 | 0.407045189 |             |
| ANP32E       | ENSG00000143401  | 1  | 150180717 | 150218504 |     | 14  | 2      | 123834 | 2.8134    | 0.0024507   | 0.4159188   |
| COA7         | ENSG00000162377  | 1  | 53142508  | 53174038  | 30  | 4   | 123834 | 2.8105 | 0.0024733 | 0.416039703 |             |
| YIPF1        | ENSG00000058799  | 1  | 54307392  | 54366407  | 153 | 10  | 123834 | 2.7979 | 0.0025721 | 0.428863832 |             |
| FAM153A      | ENSG00000170074  | 5  | 177124982 | 177220399 |     | 16  | 2      | 123834 | 2.7916    | 0.0026227   | 0.431678234 |
| DLK2         | ENSG00000171462  | 6  | 43408090  | 43434370  | 20  | 5   | 123834 | 2.7901 | 0.0026344 | 0.431678234 |             |
| XP45         | ENSG00000123552  | 6  | 99870190  | 99979604  | 132 | 15  | 123834 | 2.7872 | 0.0026587 | 0.431936492 |             |
| XPO6         | ENSG00000169180  | 16 | 28099300  | 28233241  | 89  | 3   | 123834 | 2.7728 | 0.0027789 | 0.4476384   |             |
| TOX2         | ENSG00000124191  | 20 | 42533504  | 42708256  | 242 | 35  | 123834 | 2.7653 | 0.0028437 | 0.454227308 |             |
| SYNRG        | ENSG00000006114  | 17 | 35864900  | 35979544  | 86  | 12  | 123834 | 2.7601 | 0.0028894 | 0.45768096  |             |
| NTNG2        | ENSG00000196358  | 9  | 135027334 | 135129921 |     | 52  | 10     | 123834 | 2.7471    | 0.0030063   | 0.467797698 |
| FOXO6        | ENSG00000204060  | 1  | 41817594  | 41859262  | 33  | 11  | 123834 | 2.7469 | 0.0030081 | 0.467797698 |             |
| GSTA4        | ENSG00000170899  | 6  | 52832751  | 52870176  | 103 | 12  | 123834 | 2.7448 | 0.0030271 | 0.467797698 |             |
| YARS         | ENSG00000134684  | 1  | 33230840  | 33293754  | 83  | 8   | 123834 | 2.7396 | 0.0030757 | 0.471475045 |             |
| PTMS         | ENSG00000159335  | 12 | 6864682   | 6890116   | 18  | 3   | 123834 | 2.7335 | 0.0031329 | 0.472370902 |             |
| DGKG         | ENSG00000058866  | 3  | 185813457 | 186090026 |     | 206 | 43     | 123834 | 2.7321    | 0.0031463   | 0.472370902 |
| SARDH        | ENSG00000123453  | 9  | 136518682 | 136615077 |     | 97  | 22     | 123834 | 2.7296    | 0.0031708   | 0.472370902 |
| SIRT6        | ENSG000000077463 | 19 | 4164106   | 4192601   | 22  | 5   | 123834 | 2.7274 | 0.0031914 | 0.472370902 |             |
| ADIPOR2      | ENSG00000006831  | 12 | 1787740   | 1907844   | 172 | 17  | 123834 | 2.726  | 0.0032058 | 0.472370902 |             |
| GNAT3        | ENSG00000214415  | 7  | 80077987  | 80151336  | 96  | 11  | 123834 | 2.7137 | 0.0033266 | 0.483949484 |             |
| RP11-73M18.2 | ENSG00000256500  | 14 | 104019299 | 104162261 |     | 234 | 17     | 123834 | 2.7129    | 0.0033353   |             |
| 0.483949484  |                  |    |           |           |     |     |        |        |           |             |             |
| A3GALT2      | ENSG00000184389  | 1  | 33762367  | 33796699  | 60  | 9   | 123834 | 2.7075 | 0.0033892 | 0.4880448   |             |
| PTPMT1       | ENSG00000110536  | 11 | 47576982  | 47605013  | 20  | 6   | 123834 | 2.6979 | 0.0034891 | 0.491579234 |             |
| STX1B        | ENSG00000099365  | 16 | 30990577  | 31031949  | 18  | 3   | 123834 | 2.6945 | 0.0035243 | 0.491579234 |             |
| NCAM1        | ENSG00000149294  | 11 | 112821997 | 113159158 |     | 640 | 28     | 123834 | 2.6906    | 0.0035667   | 0.491579234 |
| KBTBD4       | ENSG00000231880  | 11 | 47589277  | 47609823  | 20  | 7   | 123834 | 2.6881 | 0.0035934 | 0.491579234 |             |
| TIMP4        | ENSG00000157150  | 3  | 12184551  | 12210851  | 58  | 10  | 123834 | 2.6865 | 0.0036105 | 0.491579234 |             |
| DNAJC24      | ENSG00000170946  | 11 | 31381387  | 31463396  | 83  | 7   | 123834 | 2.6856 | 0.0036201 | 0.491579234 |             |
| TRAF7        | ENSG00000131653  | 16 | 2195699   | 2238130   | 12  | 2   | 123834 | 2.6855 | 0.0036209 | 0.491579234 |             |
| ERAL1        | ENSG00000132591  | 17 | 27171956  | 27198085  | 29  | 3   | 123834 | 2.6852 | 0.0036241 | 0.491579234 |             |
| EBLN2        | ENSG00000255423  | 3  | 73100810  | 73122488  | 35  | 5   | 123834 | 2.6832 | 0.0036465 | 0.491579234 |             |
| BAG5         | ENSG00000166170  | 14 | 104012881 | 104039168 |     | 21  | 3      | 123834 | 2.6698    | 0.0037951   | 0.508008879 |
| TSEN15       | ENSG00000198860  | 1  | 184010811 | 184053346 |     | 23  | 4      | 123834 | 2.6658    | 0.0038405   | 0.510491077 |
| RIF1         | ENSG00000080345  | 2  | 152256397 | 152374527 |     | 180 | 16     | 123834 | 2.6624    | 0.0038796   | 0.5121072   |
| DUSP14       | ENSG00000161326  | 17 | 35839937  | 35883603  | 65  | 9   | 123834 | 2.655  | 0.003966  | 0.519901572 |             |
| AFF1         | ENSG00000172493  | 4  | 87846154  | 88072206  | 336 | 22  | 123834 | 2.6452 | 0.0040818 | 0.524518744 |             |
| SEZ6         | ENSG00000063015  | 17 | 27271919  | 27343458  | 40  | 5   | 123834 | 2.6437 | 0.0041005 | 0.524518744 |             |
| FAM53C       | ENSG00000120709  | 5  | 137657624 | 137695416 |     | 62  | 8      | 123834 | 2.6428    | 0.0041108   | 0.524518744 |
| SCAMP1       | ENSG00000085365  | 5  | 77646339  | 77786562  | 306 | 11  | 123834 | 2.6428 | 0.0041116 | 0.524518744 |             |
| PPP4R2       | ENSG00000163605  | 3  | 73035936  | 73128350  | 207 | 8   | 123834 | 2.6366 | 0.0041866 | 0.530525952 |             |
| PNISR        | ENSG00000132424  | 6  | 99835927  | 99883207  | 86  | 9   | 123834 | 2.6324 | 0.0042389 | 0.531056188 |             |
| FAM222B      | ENSG00000173065  | 17 | 27072996  | 27192250  | 141 | 5   | 123834 | 2.6316 | 0.004249  | 0.531056188 |             |
| SP6          | ENSG00000189120  | 17 | 45912279  | 45943240  | 24  | 8   | 123834 | 2.6296 | 0.0042746 | 0.531056188 |             |
| NDUFAF7      | ENSG00000003509  | 2  | 37448774  | 37490546  | 87  | 13  | 123834 | 2.6081 | 0.0045528 | 0.552258199 |             |
| CCNE1        | ENSG00000105173  | 19 | 30292805  | 30325215  | 35  | 6   | 123834 | 2.6064 | 0.0045749 | 0.552258199 |             |
| MARK3        | ENSG00000075413  | 14 | 103841729 | 103980168 |     | 267 | 8      | 123834 | 2.605     | 0.0045932   | 0.552258199 |
| SCAF4        | ENSG00000156304  | 21 | 33033346  | 33114388  | 112 | 9   | 123834 | 2.6015 | 0.0046412 | 0.552258199 |             |
| CCDC64       | ENSG00000135127  | 12 | 120417673 | 120542298 |     | 186 | 12     | 123834 | 2.6001    | 0.0046601   | 0.552258199 |
| HTR3D        | ENSG00000186090  | 3  | 183739332 | 183767157 |     | 64  | 11     | 123834 | 2.599     | 0.0046752   | 0.552258199 |
| PPP1R13B     | ENSG00000088808  | 14 | 104190089 | 104323927 |     | 195 | 7      | 123834 | 2.5985    | 0.0046819   | 0.552258199 |
| FAM159A      | ENSG00000182183  | 1  | 53089016  | 53145355  | 61  | 11  | 123834 | 2.5958 | 0.0047183 | 0.552258199 |             |
| SORBS1       | ENSG00000095637  | 10 | 97061528  | 97331171  | 507 | 48  | 123834 | 2.5948 | 0.0047328 | 0.552258199 |             |
| TMEM71       | ENSG00000165071  | 8  | 133687253 | 133782958 |     | 200 | 15     | 123834 | 2.5945    | 0.0047358   | 0.552258199 |
| MRPL1        | ENSG00000169288  | 4  | 78773674  | 78883944  | 206 | 13  | 123834 | 2.5899 | 0.0048007 | 0.552880887 |             |
| CHCHD5       | ENSG00000125611  | 2  | 113331817 | 113356852 |     | 36  | 8      | 123834 | 2.5892    | 0.0048094   | 0.552880887 |
| FAM151B      | ENSG00000152380  | 5  | 79773788  | 79848382  | 109 | 13  | 123834 | 2.5879 | 0.0048284 | 0.552880887 |             |
| KBTBD4       | ENSG00000123444  | 11 | 47583749  | 47610567  | 25  | 7   | 123834 | 2.5849 | 0.0048697 | 0.554271004 |             |
| BMP4         | ENSG00000125378  | 14 | 54406454  | 54435479  | 38  | 12  | 123834 | 2.5805 | 0.0049329 | 0.5581224   |             |
| AC069368.3   | ENSG00000249240  | 15 | 65124082  | 65233118  | 211 | 14  | 123834 | 2.5742 | 0.005023  | 0.563330033 |             |
| C6ORF50      | ENSG00000145965  | 6  | 3972909   | 3994372   | 40  | 5   | 123834 | 2.5732 | 0.0050382 | 0.563330033 |             |
| CRYL1        | ENSG00000165475  | 13 | 20967806  | 21109996  | 269 | 28  | 123834 | 2.5628 | 0.0051916 | 0.571749778 |             |
| NCR1         | ENSG00000189430  | 19 | 55407508  | 55437508  | 105 | 19  | 123834 | 2.5623 | 0.0051992 | 0.571749778 |             |
| ZFYVE16      | ENSG00000039319  | 5  | 79693832  | 79785169  | 181 | 7   | 123834 | 2.5614 | 0.0052131 | 0.571749778 |             |
| NUDT18       | ENSG00000173566  | 8  | 21954383  | 21976932  | 29  | 3   | 123834 | 2.5585 | 0.0052558 | 0.571749778 |             |
| TRAF4        | ENSG00000076604  | 17 | 27061002  | 27087974  | 17  | 3   | 123834 | 2.558  | 0.0052639 | 0.571749778 |             |
| PPP3R1       | ENSG00000221823  | 2  | 68395989  | 68493369  | 145 | 7   | 123834 | 2.5481 | 0.0054154 | 0.576731803 |             |
| FAM180B      | ENSG00000196666  | 11 | 47598198  | 47620746  | 20  | 7   | 123834 | 2.5473 | 0.0054274 | 0.576731803 |             |
| COMMD7       | ENSG00000149600  | 20 | 31280493  | 31341803  | 133 | 9   | 123834 | 2.5456 | 0.0054541 | 0.576731803 |             |
| PIAS4        | ENSG00000105229  | 19 | 3997644   | 4049384   | 81  | 6   | 123834 | 2.5446 | 0.0054697 | 0.576731803 |             |
| SLC5A4       | ENSG00000100191  | 22 | 32604465  | 32661328  | 149 | 18  | 123834 | 2.5443 | 0.0054754 | 0.576731803 |             |
| TFIP11       | ENSG00000100109  | 22 | 26877191  | 26918471  | 72  | 12  | 123834 | 2.5397 | 0.005548  | 0.576731803 |             |
| GAPDHS       | ENSG00000105679  | 19 | 36014314  | 36046218  | 55  | 9   | 123834 | 2.5395 | 0.0055508 | 0.576731803 |             |
| SLTM         | ENSG00000137776  | 15 | 59161244  | 59235852  | 52  | 6   | 123834 | 2.5394 | 0.0055525 | 0.576731803 |             |
| CASKIN1      | ENSG00000167971  | 16 | 2217184   | 2256526   | 25  | 4   | 123834 | 2.535  | 0.0056223 | 0.580808035 |             |
| NKX2-8       | ENSG00000136327  | 14 | 37039784  | 37061812  | 48  | 5   | 123834 | 2.5272 | 0.0057488 | 0.586757647 |             |
| C9orf92      | ENSG00000205549  | 9  | 16193933  | 16286311  | 118 | 18  | 123834 | 2.527  | 0.0057524 | 0.586757647 |             |
| C20orf62     | ENSG00000168746  | 20 | 43070624  | 43103984  | 17  | 3   | 123834 | 2.5258 | 0.0057725 | 0.586757647 |             |
| PNO1         | ENSG00000115946  | 2  | 68374976  | 68413370  | 62  | 6   |        |        |           |             |             |

|                |                 |    |           |           |      |     |        |        |           |             |             |
|----------------|-----------------|----|-----------|-----------|------|-----|--------|--------|-----------|-------------|-------------|
| TMEM17         | ENSG00000186889 | 2  | 62717356  | 62749029  | 81   | 15  | 123834 | 2.497  | 0.0062618 | 0.607363788 |             |
| PPIF           | ENSG00000108179 | 10 | 81097225  | 81125093  | 36   | 4   | 123834 | 2.497  | 0.0062628 | 0.607363788 |             |
| IQCF3          | ENSG00000229972 | 3  | 51841620  | 51874876  | 41   | 1   | 123834 | 2.4925 | 0.0063424 | 0.611961113 |             |
| IFNAR1         | ENSG00000142166 | 21 | 34686734  | 34742168  | 107  | 11  | 123834 | 2.4858 | 0.0064626 | 0.619001729 |             |
| HOXA7          | ENSG00000122592 | 7  | 27183335  | 27207555  | 37   | 6   | 123834 | 2.4848 | 0.0064805 | 0.619001729 |             |
| CCDC183        | ENSG00000213213 | 9  | 139680802 | 139712193 |      | 35  | 4      | 123834 | 2.4805    | 0.0065592   | 0.619379894 |
| GNLY           | ENSG00000115523 | 2  | 85902298  | 85935977  | 79   | 7   | 123834 | 2.4797 | 0.0065743 | 0.619379894 |             |
| RUSC2          | ENSG00000198853 | 9  | 35480124  | 35571895  | 62   | 12  | 123834 | 2.4781 | 0.0066048 | 0.619379894 |             |
| RGS2           | ENSG00000116741 | 1  | 192768169 | 192791403 |      | 18  | 3      | 123834 | 2.4775    | 0.0066148   | 0.619379894 |
| LPHN3          | ENSG00000150471 | 4  | 62056976  | 62954053  | 1084 | 72  | 123834 | 2.4743 | 0.0066742 | 0.6218784   |             |
| RAB26          | ENSG00000167964 | 16 | 2180804   | 2214166   | 18   | 3   | 123834 | 2.4715 | 0.0067274 | 0.623777655 |             |
| RP11-216L13.17 | ENSG00000272896 | 9  | 139675831 | 139705047 |      | 51  | 4      | 123834 | 2.4634    | 0.0068818   |             |
| 0.634996381    |                 |    |           |           |      |     |        |        |           |             |             |
| CDC25C         | ENSG00000158402 | 5  | 137610954 | 137684044 |      | 113 | 10     | 123834 | 2.4576    | 0.0069931   | 0.639173278 |
| DBH            | ENSG00000123454 | 9  | 136491482 | 136534466 |      | 64  | 17     | 123834 | 2.4572    | 0.0070011   | 0.639173278 |
| NQO2           | ENSG00000124588 | 6  | 2978221   | 3029996   | 184  | 20  | 123834 | 2.4549 | 0.0070461 | 0.639173278 |             |
| DPY19L1        | ENSG00000173852 | 7  | 34958488  | 35087883  | 287  | 10  | 123834 | 2.4539 | 0.0070663 | 0.639173278 |             |
| CREB3L3        | ENSG00000060566 | 19 | 4143598   | 4183051   | 39   | 6   | 123834 | 2.4524 | 0.0070952 | 0.639173278 |             |
| PIPOX          | ENSG00000179761 | 17 | 27267531  | 27394234  | 92   | 15  | 123834 | 2.4488 | 0.0071664 | 0.64191744  |             |
| TTPAL          | ENSG00000124120 | 20 | 43094526  | 43133244  | 38   | 4   | 123834 | 2.4461 | 0.0072207 | 0.64191744  |             |
| ARNTL          | ENSG00000133794 | 11 | 13288199  | 13418813  | 165  | 14  | 123834 | 2.4439 | 0.0072644 | 0.64191744  |             |
| TMEM141        | ENSG00000244187 | 9  | 139675807 | 139697709 |      | 45  | 3      | 123834 | 2.4422    | 0.007299    | 0.64191744  |
| PTCH1          | ENSG00000185920 | 9  | 98195262  | 98289339  | 93   | 6   | 123834 | 2.4405 | 0.0073332 | 0.64191744  |             |
| PAX5           | ENSG00000196092 | 9  | 36823272  | 37044103  | 404  | 39  | 123834 | 2.4387 | 0.0073701 | 0.64191744  |             |
| BCL9           | ENSG00000116128 | 1  | 147003182 | 147108017 |      | 172 | 31     | 123834 | 2.4374    | 0.0073969   | 0.64191744  |
| GMNC           | ENSG00000205835 | 3  | 190560666 | 190620218 |      | 73  | 10     | 123834 | 2.4362    | 0.0074207   | 0.64191744  |
| RP11-474G23.1  | ENSG00000273398 | 2  | 68348370  | 68498362  | 206  | 10  | 123834 | 2.4358 | 0.0074296 | 0.64191744  |             |
| FAM160B2       | ENSG00000158863 | 8  | 21936670  | 21972409  | 48   | 7   | 123834 | 2.4291 | 0.0075675 | 0.647868672 |             |
| COQ3           | ENSG00000132423 | 6  | 99807276  | 99852080  | 93   | 11  | 123834 | 2.4287 | 0.0075761 | 0.647868672 |             |
| BCMO1          | ENSG00000135697 | 16 | 81262053  | 81334747  | 55   | 11  | 123834 | 2.4269 | 0.007615  | 0.647868672 |             |
| FBXO47         | ENSG00000204952 | 17 | 37082685  | 37133655  | 33   | 4   | 123834 | 2.4246 | 0.0076627 | 0.647868672 |             |
| TADA2A         | ENSG00000108264 | 17 | 35756965  | 35849835  | 185  | 14  | 123834 | 2.4243 | 0.0076689 | 0.647868672 |             |
| FAXC           | ENSG00000146267 | 6  | 99709045  | 99807938  | 265  | 18  | 123834 | 2.4209 | 0.007742  | 0.649060947 |             |
| TTC40          | ENSG00000171811 | 10 | 134611896 | 134766327 |      | 444 | 31     | 123834 | 2.4189    | 0.0077848   | 0.649060947 |
| RP11-65D24.2   | ENSG00000204398 | 13 | 112230548 | 112334955 |      | 226 | 29     | 123834 | 2.4174    | 0.0078165   |             |
| 0.649060947    |                 |    |           |           |      |     |        |        |           |             |             |
| FAM63A         | ENSG00000143409 | 1  | 150959025 | 150990851 |      | 40  | 7      | 123834 | 2.4172    | 0.0078196   | 0.649060947 |
| ACPL2          | ENSG00000155893 | 3  | 140937568 | 141023748 |      | 153 | 16     | 123834 | 2.4146    | 0.0078753   | 0.649398857 |
| HIST1H1E       | ENSG00000168298 | 6  | 26146559  | 26167343  | 12   | 5   | 123834 | 2.4139 | 0.007892  | 0.649398857 |             |
| HIST1H4H       | ENSG00000158406 | 6  | 26271283  | 26295762  | 57   | 7   | 123834 | 2.4092 | 0.007994  | 0.65495669  |             |
| PLEKHH2        | ENSG00000152527 | 2  | 43854412  | 44005126  | 297  | 25  | 123834 | 2.4064 | 0.0080556 | 0.655266424 |             |
| PTPRS          | ENSG00000105426 | 19 | 5148506   | 5350814   | 282  | 51  | 123834 | 2.4055 | 0.0080762 | 0.655266424 |             |
| PKD1           | ENSG00000008710 | 16 | 2128711   | 2195899   | 44   | 4   | 123834 | 2.4043 | 0.0081012 | 0.655266424 |             |
| TIMM17A        | ENSG00000134375 | 1  | 201914619 | 201949789 |      | 39  | 6      | 123834 | 2.3996    | 0.0082075   | 0.659762066 |
| RP11-351M8.1   | ENSG00000259649 | 15 | 81178532  | 81212118  | 25   | 3   | 123834 | 2.3987 | 0.0082262 | 0.659762066 |             |
| ZNF655         | ENSG00000197343 | 7  | 99146029  | 99184076  | 34   | 6   | 123834 | 2.3958 | 0.0082918 | 0.662229136 |             |
| ZDHHC16        | ENSG00000171307 | 10 | 99195927  | 99227127  | 38   | 9   | 123834 | 2.3923 | 0.0083715 | 0.665796954 |             |
| CNOT4          | ENSG00000080802 | 7  | 135036547 | 135204875 |      | 211 | 21     | 123834 | 2.3904    | 0.0084161   | 0.66655512  |
| DHX34          | ENSG00000134815 | 19 | 47842538  | 47895961  | 133  | 10  | 123834 | 2.3871 | 0.0084902 | 0.6696337   |             |
| HTHPA          | ENSG00000259431 | 14 | 24015216  | 24039480  | 8    | 2   | 123834 | 2.3844 | 0.0085527 | 0.669640659 |             |
| TMEM56-RWDD3   | ENSG00000271092 | 1  | 95573479  | 95722781  | 295  | 19  | 123834 | 2.3822 | 0.0086057 | 0.669640659 |             |
| PGPEP1         | ENSG00000130517 | 19 | 18441397  | 18490760  | 20   | 5   | 123834 | 2.3799 | 0.008659  | 0.669640659 |             |
| NDUFS3         | ENSG00000213619 | 11 | 47576888  | 47616114  | 33   | 8   | 123834 | 2.3785 | 0.0086925 | 0.669640659 |             |
| PTGIS          | ENSG00000124212 | 20 | 48110411  | 48194683  | 55   | 8   | 123834 | 2.3765 | 0.0087394 | 0.669640659 |             |
| HR             | ENSG00000168453 | 8  | 21961928  | 22000897  | 49   | 7   | 123834 | 2.3761 | 0.0087488 | 0.669640659 |             |
| PYGO1          | ENSG00000171016 | 15 | 55821088  | 55891145  | 169  | 13  | 123834 | 2.3754 | 0.0087657 | 0.669640659 |             |
| APOPT1         | ENSG00000256053 | 14 | 104019299 | 104083860 |      | 101 | 9      | 123834 | 2.3724    | 0.0088366   | 0.669640659 |
| CHAMP1         | ENSG00000198824 | 13 | 115069988 | 115102796 |      | 35  | 2      | 123834 | 2.3703    | 0.0088859   | 0.669640659 |
| NFAT5          | ENSG00000102908 | 16 | 69588997  | 69748569  | 275  | 13  | 123834 | 2.37   | 0.0088943 | 0.669640659 |             |
| HOXA6          | ENSG00000106006 | 7  | 27175015  | 27200222  | 39   | 6   | 123834 | 2.3679 | 0.0089439 | 0.669640659 |             |
| MADD           | ENSG00000110514 | 11 | 47280712  | 47361582  | 125  | 10  | 123834 | 2.3674 | 0.0089573 | 0.669640659 |             |
| ISCA2          | ENSG00000165898 | 14 | 74950423  | 74973809  | 27   | 3   | 123834 | 2.3671 | 0.0089636 | 0.669640659 |             |
| KIAA1522       | ENSG00000162522 | 1  | 33197486  | 33250571  | 42   | 8   | 123834 | 2.3663 | 0.0089835 | 0.669640659 |             |
| FOXJ1          | ENSG00000129654 | 17 | 74122414  | 74147380  | 9    | 2   | 123834 | 2.3635 | 0.0090524 | 0.671899518 |             |
| SMAP2          | ENSG00000084070 | 1  | 40800522  | 40898998  | 145  | 24  | 123834 | 2.3622 | 0.0090845 | 0.671899518 |             |
| C9orf172       | ENSG00000232434 | 9  | 139728867 | 139751797 |      | 4   | 1      | 123834 | 2.3577    | 0.0091933   | 0.67345344  |
| MTMR11         | ENSG0000014914  | 1  | 149890543 | 149918791 |      | 30  | 3      | 123834 | 2.3571    | 0.0092093   | 0.67345344  |
| STX4           | ENSG00000103496 | 16 | 31034210  | 31064296  | 33   | 4   | 123834 | 2.357  | 0.0092118 | 0.67345344  |             |
| XRCC5          | ENSG00000079246 | 2  | 216962187 | 217081026 |      | 168 | 19     | 123834 | 2.3547    | 0.0092689   | 0.673844441 |
| PRSS53         | ENSG00000151006 | 16 | 31084746  | 31110949  | 14   | 2   | 123834 | 2.3528 | 0.0093156 | 0.673844441 |             |
| ASPRV1         | ENSG00000244617 | 2  | 70177226  | 70199397  | 30   | 3   | 123834 | 2.3525 | 0.0093235 | 0.673844441 |             |
| GTF2H1         | ENSG00000110768 | 11 | 18333842  | 18398591  | 98   | 10  | 123834 | 2.3498 | 0.0093906 | 0.6761232   |             |
| MLST8          | ENSG00000167965 | 16 | 2244249   | 2269417   | 23   | 4   | 123834 | 2.3422 | 0.0095863 | 0.678579527 |             |
| FBLN7          | ENSG00000144152 | 2  | 112885962 | 112955791 |      | 102 | 16     | 123834 | 2.342     | 0.0095906   | 0.678579527 |
| PRED60         | ENSG00000267883 | 21 | 47173565  | 47200005  | 28   | 3   | 123834 | 2.342  | 0.0095914 | 0.678579527 |             |
| AMIGO1         | ENSG00000181754 | 1  | 110036797 | 110062360 |      | 25  | 5      | 123834 | 2.3393    | 0.0096602   | 0.678579527 |
| JAGN1          | ENSG00000171135 | 3  | 9922238   | 9946033   | 40   | 6   | 123834 | 2.3391 | 0.009666  | 0.678579527 |             |
| ZNF844         | ENSG00000223547 | 19 | 12165514  | 12202380  | 67   | 5   | 123834 | 2.3385 | 0.0096817 | 0.678579527 |             |
| FADS1          | ENSG00000149485 | 11 | 61557099  | 61606790  | 48   | 5   | 123834 | 2.338  | 0.0096931 | 0.678579527 |             |
| DYNC2L1        | ENSG00000138036 | 2  | 43991178  | 44047149  | 140  | 10  | 123834 | 2.3371 | 0.009717  | 0.678579527 |             |
| RPLP2          | ENSG00000177600 | 11 | 799647    | 822880    | 23   | 4   | 123834 | 2.3334 | 0.0098145 | 0.678579527 |             |
| SERINC3        | ENSG00000132824 | 20 | 43114862  | 43160750  | 48   | 5   | 123834 | 2.3316 | 0.0098597 | 0.678579527 |             |
| ATP5J2-PTCD1   | ENSG00000248919 | 7  | 99007372  | 99073820  | 101  | 8   | 123834 | 2.3303 | 0.0098955 | 0.678579527 |             |
| TP53INP2       | ENSG00000078804 | 20 | 33282094  | 33311243  | 18   | 4   | 123834 | 2.3296 | 0.0099127 | 0.678579527 |             |
| PAQR6          | ENSG00000160781 | 1  | 156203206 | 156227881 |      | 7   | 3      | 123834 | 2.3235    | 0.010076    | 0.678579527 |
| NR1H3          | ENSG00000025434 | 11 | 47259851  | 47300396  | 69   | 7   | 123834 | 2.3226 | 0.0101    | 0.678579527 |             |
| SF3B4          | ENSG00000143368 | 1  | 149885209 | 149910236 |      | 29  | 2      | 123834 | 2.3208    | 0.010149    | 0.678579527 |
| PTCD1          | ENSG00000106246 | 7  | 99004362  | 99073787  | 107  | 9   | 123834 | 2.3202 | 0.010165  | 0.678579527 |             |
| DPH3           | ENSG00000154813 | 3  | 16289485  | 16316479  | 67   | 7   | 123834 | 2.3166 | 0.010263  | 0.678579527 |             |
| RHEB           | ENSG00000106615 | 7  | 151153098 | 15122706  |      | 68  | 7      | 123834 | 2.3155    | 0.010292    | 0.678579527 |
| DHRS13         | ENSG00000167536 | 17 | 27214799  | 27240089  | 9    | 3   | 123834 | 2.3149 | 0.01031   | 0.678579527 |             |
| CALHM3         | ENSG00000183128 | 10 | 105222561 | 105248997 |      | 45  | 6      | 123834 | 2.3124    | 0.010378    | 0.678579527 |
| UBQLN4         | ENSG00000160803 | 1  | 155995092 | 156033585 |      | 19  | 5      | 123834 | 2.3122    | 0.010383    | 0.678579527 |
| CRABP1         | ENSG00000166426 | 15 | 78622666  | 78650572  | 26   | 7   | 123834 | 2.3107 | 0.010423  | 0.678579527 |             |
| MX2            | ENSG00000183486 | 21 | 42723870  | 42791317  | 89   | 22  | 123834 | 2.309  | 0.01047   | 0.678579527 |             |
| ZNF646         | ENSG00000167395 | 16 | 31075743  | 31105517  | 23   | 3   | 123834 | 2.3088 |           |             |             |

|               |                  |    |           |          |           |           |        |        |          |             |                      |
|---------------|------------------|----|-----------|----------|-----------|-----------|--------|--------|----------|-------------|----------------------|
| EXOSC1        | ENSG00000171311  | 10 | 99185899  | 99215774 | 38        | 9         | 123834 | 2.3049 | 0.010587 | 0.678579527 |                      |
| RP11-1026M7.2 | ENSG00000249109  | 5  | 177199198 |          |           | 177231397 | 1      | 1      | 123834   | 2.303       | 0.01064 0.678579527  |
| TMEM89        | ENSG00000183396  | 3  | 48648192  | 48669288 | 10        | 2         | 123834 | 2.3027 | 0.010648 | 0.678579527 |                      |
| VKORC1        | ENSG00000167397  | 16 | 31092163  | 31117301 | 15        | 2         | 123834 | 2.3026 | 0.010651 | 0.678579527 |                      |
| C12orf43      | ENSG00000157895  | 12 | 121430225 |          | 121464305 |           | 95     | 14     | 123834   | 2.3011      | 0.010692 0.678579527 |
| B4GALT5       | ENSG00000158470  | 20 | 48239482  | 48340415 | 176       | 11        | 123834 | 2.3003 | 0.010714 | 0.678579527 |                      |
| SMARCD1       | ENSG00000066117  | 12 | 50468755  | 50504495 | 22        | 3         | 123834 | 2.2999 | 0.010727 | 0.678579527 |                      |
| RP11-196G11.1 | ENSG00000255439  | 16 | 31084760  | 31116277 | 17        | 3         | 123834 | 2.2995 | 0.010739 | 0.678579527 |                      |
| C17orf78      | ENSG00000167230  | 17 | 35722928  | 35759662 | 24        | 6         | 123834 | 2.2987 | 0.010761 | 0.678579527 |                      |
| BCL6          | ENSG00000113916  | 3  | 187429165 |          | 187473515 |           | 76     | 15     | 123834   | 2.2958      | 0.010843 0.678579527 |
| NPC2          | ENSG00000119655  | 14 | 74932895  | 74970880 | 58        | 3         | 123834 | 2.2958 | 0.010844 | 0.678579527 |                      |
| KCTD10        | ENSG00000110906  | 12 | 109876461 |          | 109925349 |           | 150    | 12     | 123834   | 2.2946      | 0.010877 0.678579527 |
| C15orf60      | ENSG00000183324  | 15 | 73725499  | 73862355 | 210       | 13        | 123834 | 2.2938 | 0.010902 | 0.678579527 |                      |
| AGTRAP        | ENSG00000177674  | 1  | 11786141  | 11824859 | 20        | 5         | 123834 | 2.2904 | 0.010998 | 0.678579527 |                      |
| RWDD3         | ENSG00000122481  | 1  | 95689711  | 95722781 | 78        | 11        | 123834 | 2.2894 | 0.011028 | 0.678579527 |                      |
| TTBK1         | ENSG00000146216  | 6  | 43201418  | 43265997 | 74        | 12        | 123834 | 2.2883 | 0.011059 | 0.678579527 |                      |
| NRXN1         | ENSG00000179915  | 2  | 50135643  | 51269674 | 1799      | 93        | 123834 | 2.2869 | 0.011102 | 0.678579527 |                      |
| SPOCD1        | ENSG00000134668  | 1  | 32246023  | 32291652 | 33        | 6         | 123834 | 2.2858 | 0.011133 | 0.678579527 |                      |
| NCOA6         | ENSG00000198646  | 20 | 33274722  | 33423452 | 153       | 10        | 123834 | 2.2857 | 0.011135 | 0.678579527 |                      |
| NOS3          | ENSG00000164867  | 7  | 150678083 |          | 150721676 |           | 28     | 7      | 123834   | 2.2851      | 0.011154 0.678579527 |
| DIS3L         | ENSG00000166938  | 15 | 66575555  | 66636236 | 96        | 16        | 123834 | 2.285  | 0.011157 | 0.678579527 |                      |
| SLC33A1       | ENSG00000169359  | 3  | 155528813 |          | 155582218 |           | 92     | 9      | 123834   | 2.2844      | 0.011174 0.678579527 |
| SLC26A6       | ENSG00000225697  | 3  | 48653156  | 48682926 | 22        | 2         | 123834 | 2.2789 | 0.011338 | 0.68344853  |                      |
| LHX9          | ENSG00000143355  | 1  | 197871037 |          | 197914608 |           | 58     | 9      | 123834   | 2.2782      | 0.011358 0.68344853  |
| BUD31         | ENSG00000106245  | 7  | 98996264  | 99027239 | 44        | 6         | 123834 | 2.2771 | 0.01139  | 0.68344853  |                      |
| FSD1          | ENSG00000105255  | 19 | 4294597   | 4333840  | 48        | 7         | 123834 | 2.2769 | 0.011398 | 0.68344853  |                      |
| CEP68         | ENSG00000011523  | 2  | 65273500  | 65324138 | 91        | 10        | 123834 | 2.2731 | 0.011511 | 0.685590729 |                      |
| KCNQ3         | ENSG00000184156  | 8  | 133123108 |          | 133503200 |           | 726    | 59     | 123834   | 2.272       | 0.011544 0.685590729 |
| AGPAT1        | ENSG00000204310  | 6  | 32125989  | 32155873 | 28        | 8         | 123834 | 2.2715 | 0.011558 | 0.685590729 |                      |
| DEF8          | ENSG00000140995  | 16 | 90004333  | 90044468 | 119       | 12        | 123834 | 2.2709 | 0.011578 | 0.685590729 |                      |
| HOXA5         | ENSG00000106004  | 7  | 27170671  | 27193287 | 36        | 7         | 123834 | 2.269  | 0.011635 | 0.686826335 |                      |
| TLE4          | ENSG00000106829  | 9  | 82176688  | 82351658 | 192       | 22        | 123834 | 2.2666 | 0.011708 | 0.687866667 |                      |
| CD200R1       | ENSG00000163606  | 3  | 112630056 |          | 112703969 |           | 222    | 23     | 123834   | 2.266       | 0.011725 0.687866667 |
| SORBS3        | ENSG00000120896  | 8  | 22392499  | 22443301 | 19        | 3         | 123834 | 2.2626 | 0.01183  | 0.6918912   |                      |
| CACNA2D2      | ENSG00000007402  | 3  | 50390233  | 50551675 | 73        | 9         | 123834 | 2.2574 | 0.01199  | 0.699097914 |                      |
| SBSN          | ENSG00000189001  | 19 | 36004269  | 36029253 | 38        | 7         | 123834 | 2.2489 | 0.012259 | 0.70224     |                      |
| ACOX1         | ENSG00000161533  | 17 | 73927588  | 73985515 | 120       | 14        | 123834 | 2.2482 | 0.012283 | 0.70224     |                      |
| RBM44         | ENSG00000177483  | 2  | 238697032 |          | 238761451 |           | 78     | 10     | 123834   | 2.2461      | 0.012349 0.70224     |
| CPSF4         | ENSG00000160917  | 7  | 99026545  | 99064994 | 58        | 6         | 123834 | 2.2442 | 0.012411 | 0.70224     |                      |
| SERBP1        | ENSG00000142864  | 1  | 67863493  | 67906098 | 19        | 4         | 123834 | 2.2436 | 0.01243  | 0.70224     |                      |
| GXYLT2        | ENSG00000172986  | 3  | 72927224  | 73057289 | 216       | 22        | 123834 | 2.2436 | 0.01243  | 0.70224     |                      |
| NME4          | ENSG00000103202  | 16 | 436725    | 470367   | 43        | 7         | 123834 | 2.2424 | 0.012467 | 0.70224     |                      |
| MBTD1         | ENSG00000011258  | 17 | 49244786  | 49347524 | 194       | 12        | 123834 | 2.2421 | 0.012476 | 0.70224     |                      |
| GS1-259H13.10 | ENSG00000272647  | 7  | 99146291  | 99215433 | 73        | 8         | 123834 | 2.2418 | 0.012488 | 0.70224     |                      |
| OXNAD1        | ENSG00000154814  | 3  | 16296706  | 16401806 | 221       | 14        | 123834 | 2.238  | 0.01261  | 0.70224     |                      |
| C15orf41      | ENSG00000186073  | 15 | 36861812  | 37112449 | 344       | 28        | 123834 | 2.2375 | 0.012626 | 0.70224     |                      |
| TNFAIP8L2     | ENSG00000163154  | 1  | 151119105 |          | 151142225 |           | 7      | 3      | 123834   | 2.2374      | 0.012631 0.70224     |
| ADPRHL2       | ENSG00000116863  | 1  | 36544476  | 36569533 | 13        | 3         | 123834 | 2.2368 | 0.01265  | 0.70224     |                      |
| NPTN          | ENSG00000156642  | 15 | 73842355  | 73936475 | 134       | 12        | 123834 | 2.2355 | 0.012694 | 0.70224     |                      |
| ABCB6         | ENSG00000115657  | 2  | 220064490 |          | 220093712 |           | 15     | 2      | 123834   | 2.2341      | 0.012737 0.70224     |
| PCBP3         | ENSG00000183570  | 21 | 47053608  | 47372368 | 550       | 15        | 123834 | 2.2319 | 0.012812 | 0.70224     |                      |
| COL9A2        | ENSG00000049089  | 1  | 40756159  | 40793488 | 79        | 9         | 123834 | 2.2317 | 0.012817 | 0.70224     |                      |
| ABLIM2        | ENSG00000163995  | 4  | 7957039   | 8170559  | 215       | 51        | 123834 | 2.2297 | 0.012882 | 0.70224     |                      |
| TEN1          | ENSG000000257949 | 17 | 73965301  | 74006667 | 99        | 13        | 123834 | 2.228  | 0.012941 | 0.70224     |                      |
| DNAH2         | ENSG00000183914  | 17 | 7610672   | 7747062  | 101       | 22        | 123834 | 2.2272 | 0.012967 | 0.70224     |                      |
| NEB           | ENSG00000183091  | 2  | 152331850 |          | 152601001 |           | 292    | 22     | 123834   | 2.2272      | 0.012968 0.70224     |
| SULF2         | ENSG00000196562  | 20 | 46275092  | 46425360 | 202       | 47        | 123834 | 2.2255 | 0.013023 | 0.70224     |                      |
| VARS          | ENSG00000204394  | 6  | 31735295  | 31773730 | 51        | 15        | 123834 | 2.2255 | 0.013025 | 0.70224     |                      |
| HOOK1         | ENSG00000134709  | 1  | 60270458  | 60352050 | 138       | 14        | 123834 | 2.2249 | 0.013045 | 0.70224     |                      |
| GNA12         | ENSG00000146535  | 7  | 27577746  | 2893958  | 288       | 12        | 123834 | 2.2234 | 0.013094 | 0.70224     |                      |
| SPA17         | ENSG00000064199  | 11 | 124533694 |          | 124577414 |           | 21     | 2      | 123834   | 2.2224      | 0.013128 0.70224     |
| KCNJ4         | ENSG00000168135  | 22 | 38812332  | 38861205 | 71        | 13        | 123834 | 2.22   | 0.01321  | 0.70224     |                      |
| STAE          | ENSG00000110013  | 11 | 124493009 |          | 124575603 |           | 40     | 3      | 123834   | 2.2174      | 0.013298 0.70224     |
| NCAM2         | ENSG00000154654  | 21 | 22360633  | 22925650 | 1096      | 72        | 123834 | 2.2169 | 0.013317 | 0.70224     |                      |
| PAIP1         | ENSG00000172239  | 5  | 43516369  | 43567860 | 80        | 6         | 123834 | 2.2153 | 0.013368 | 0.70224     |                      |
| GPR132        | ENSG00000183484  | 14 | 105505728 |          | 105541782 |           | 45     | 4      | 123834   | 2.2152      | 0.013375 0.70224     |
| ABCG2         | ENSG00000118777  | 4  | 89001416  | 89162474 | 227       | 35        | 123834 | 2.2144 | 0.013399 | 0.70224     |                      |
| UTP18         | ENSG00000011260  | 17 | 49327889  | 49385297 | 100       | 9         | 123834 | 2.2136 | 0.013428 | 0.70224     |                      |
| CSMD2         | ENSG00000121904  | 1  | 33969609  | 34641443 | 779       | 92        | 123834 | 2.213  | 0.013448 | 0.70224     |                      |
| IL7           | ENSG00000104432  | 8  | 79577978  | 79727758 | 269       | 14        | 123834 | 2.2115 | 0.013501 | 0.70224     |                      |
| SEZ6L         | ENSG00000100095  | 22 | 26555440  | 26789562 | 434       | 53        | 123834 | 2.2106 | 0.013531 | 0.70224     |                      |
| PRR24         | ENSG00000257704  | 19 | 47768142  | 47788979 | 19        | 2         | 123834 | 2.2091 | 0.013584 | 0.70224     |                      |
| NME1          | ENSG00000239672  | 17 | 49220897  | 49249789 | 78        | 11        | 123834 | 2.2075 | 0.013638 | 0.70224     |                      |
| GREB1         | ENSG00000196208  | 2  | 11664242  | 11792914 | 166       | 26        | 123834 | 2.2074 | 0.013642 | 0.70224     |                      |
| ATG9A         | ENSG00000198925  | 2  | 220064494 |          | 220104439 |           | 29     | 3      | 123834   | 2.2062      | 0.013684 0.70224     |
| PLEKHA6       | ENSG00000143850  | 1  | 204177979 |          | 204356793 |           | 329    | 27     | 123834   | 2.2059      | 0.013695 0.70224     |
| C5orf28       | ENSG00000151881  | 5  | 43434354  | 43493995 | 106       | 6         | 123834 | 2.2051 | 0.013722 | 0.70224     |                      |
| GPR65         | ENSG00000140030  | 14 | 88461468  | 88488419 | 72        | 9         | 123834 | 2.205  | 0.013726 | 0.70224     |                      |
| BCL11A        | ENSG00000119866  | 2  | 60668302  | 60790702 | 45        | 13        | 123834 | 2.2046 | 0.01374  | 0.70224     |                      |
| RP11-187E13.2 | ENSG00000258386  | 14 | 32466108  | 32497891 | 14        | 3         | 123834 | 2.2035 | 0.013779 | 0.70224     |                      |
| KDM6B         | ENSG00000132510  | 17 | 7733222   | 7768114  | 32        | 8         | 123834 | 2.2022 | 0.013826 | 0.70224     |                      |
| THRAP3        | ENSG00000054118  | 1  | 36680017  | 36780958 | 64        | 2         | 123834 | 2.2011 | 0.013866 | 0.70224     |                      |
| ADAMTS10      | ENSG00000142303  | 19 | 8635126   | 8685620  | 15        | 5         | 123834 | 2.1998 | 0.013912 | 0.70224     |                      |
| C1QTNF9B      | ENSG00000205863  | 13 | 24455238  | 24486794 | 47        | 6         | 123834 | 2.1991 | 0.013935 | 0.70224     |                      |
| UBE3B         | ENSG00000151148  | 12 | 109905207 |          | 109984507 |           | 203    | 18     | 123834   | 2.1987      | 0.013948 0.70224     |
| LRRC10B       | ENSG00000204950  | 11 | 61266272  | 61288482 | 27        | 4         | 123834 | 2.1986 | 0.013952 | 0.70224     |                      |
| TUBB3         | ENSG00000258947  | 16 | 89977800  | 90015169 | 92        | 13        | 123834 | 2.1983 | 0.013965 | 0.70224     |                      |
| FAM200A       | ENSG00000221909  | 7  | 99133931  | 99166159 | 23        | 4         | 123834 | 2.1955 | 0.014066 | 0.703894677 |                      |
| ARNTL2        | ENSG00000029153  | 12 | 27475787  | 27586241 | 247       | 35        | 123834 | 2.1947 | 0.014093 | 0.703894677 |                      |
| SPOCK2        | ENSG00000107742  | 10 | 73808793  | 73858790 | 47        | 7         | 123834 | 2.1943 | 0.014109 | 0.703894677 |                      |
| TSPAN5        | ENSG00000168785  | 4  | 99381518  | 99589780 | 214       | 32        | 123834 | 2.1908 | 0.014233 | 0.708222157 |                      |
| C11orf94      | ENSG00000234776  | 11 | 45918085  | 45938833 | 8         | 2         | 123834 | 2.1885 | 0.014317 | 0.708880825 |                      |
| TNNI2         | ENSG00000130598  | 11 | 1850219   | 1872910  | 2         | 1         | 123834 | 2.1868 | 0.01438  | 0.708880825 |                      |
| ACKR3         | ENSG00000144476  | 2  | 237466430 |          | 237501001 |           | 37     | 6      | 123834   | 2.1855      | 0.014428 0.708880825 |
| C5orf20       | ENSG00000251380  | 5  | 134769905 |          | 1347930   |           |        |        |          |             |                      |

|               |                  |    |           |           |           |           |        |        |          |                                   |
|---------------|------------------|----|-----------|-----------|-----------|-----------|--------|--------|----------|-----------------------------------|
| MGA           | ENSG00000174197  | 15 | 41903422  | 42072141  | 249       | 17        | 123834 | 2.1751 | 0.014811 | 0.719588571                       |
| TCF7L2        | ENSG00000148737  | 10 | 114700009 |           | 114937437 |           | 176    | 30     | 123834   | 2.1743 0.01484 0.719588571        |
| STK40         | ENSG00000196182  | 1  | 36795225  | 36861497  | 45        | 5         | 123834 | 2.1701 | 0.014998 | 0.72086681                        |
| MUC20         | ENSG00000176945  | 3  | 195437753 |           | 195477994 |           | 2      | 1      | 123834   | 2.1684 0.015062 0.72086681        |
| NAP1L1        | ENSG00000187109  | 12 | 76428670  | 76488813  | 47        | 4         | 123834 | 2.1681 | 0.015074 | 0.72086681                        |
| MEX3D         | ENSG00000181588  | 19 | 1544668   | 1578057   | 6         | 3         | 123834 | 2.1678 | 0.015089 | 0.72086681                        |
| VPS45         | ENSG00000136631  | 1  | 150029369 |           | 150127505 |           | 94     | 2      | 123834   | 2.1676 0.015094 0.72086681        |
| MET           | ENSG00000105976  | 7  | 116302444 |           | 116448440 |           | 121    | 18     | 123834   | 2.1665 0.015137 0.72086681        |
| RTN4RL1       | ENSG00000185924  | 17 | 1827971   | 1938639   | 146       | 23        | 123834 | 2.1658 | 0.015165 | 0.72086681                        |
| RAB1A         | ENSG00000138069  | 2  | 65287835  | 65367240  | 154       | 11        | 123834 | 2.165  | 0.015195 | 0.72086681                        |
| YAE1D1        | ENSG00000241127  | 7  | 39595975  | 39659919  | 135       | 14        | 123834 | 2.1639 | 0.015235 | 0.72086681                        |
| BNIP3L        | ENSG00000104765  | 8  | 26230414  | 26373152  | 268       | 40        | 123834 | 2.1636 | 0.015246 | 0.72086681                        |
| CCDC9         | ENSG00000105321  | 19 | 47749237  | 47785210  | 38        | 2         | 123834 | 2.1614 | 0.015332 | 0.72086681                        |
| CDYL          | ENSG00000153046  | 6  | 4696393   | 4965785   | 350       | 36        | 123834 | 2.1579 | 0.015466 | 0.72086681                        |
| DKFZP434A062  | ENSG00000267845  | 9  |           | 139209089 |           | 139229640 |        | 22     | 4        | 123834 2.1579 0.015468 0.72086681 |
| AP1G2         | ENSG00000213983  | 14 | 24018774  | 24047279  | 11        | 2         | 123834 | 2.1576 | 0.015478 | 0.72086681                        |
| HAO2          | ENSG00000116882  | 1  | 119901402 |           | 119946753 |           | 59     | 7      | 123834   | 2.1571 0.015501 0.72086681        |
| C16orf13      | ENSG00000130731  | 16 | 674429    | 696358    | 20        | 4         | 123834 | 2.1569 | 0.015507 | 0.72086681                        |
| FA2H          | ENSG00000103089  | 16 | 74736853  | 74818729  | 136       | 22        | 123834 | 2.1565 | 0.015522 | 0.72086681                        |
| DKFZP434O1614 | ENSG00000258729  | 14 |           | 96731383  | 96753060  | 27        |        | 4      | 123834   | 2.1558 0.015549 0.72086681        |
| TMEM8A        | ENSG00000129925  | 16 | 410773    | 447113    | 89        | 13        | 123834 | 2.1543 | 0.015609 | 0.720880696                       |
| CHML          | ENSG00000203668  | 1  | 241782155 |           | 241809232 |           | 48     | 10     | 123834   | 2.1524 0.015685 0.720880696       |
| ITGB3         | ENSG00000259207  | 17 | 45321212  | 45431658  | 292       | 22        | 123834 | 2.1519 | 0.015701 | 0.720880696                       |
| ITGB3         | ENSG00000259753  | 17 | 45321263  | 45431658  | 292       | 22        | 123834 | 2.1519 | 0.015701 | 0.720880696                       |
| ANKZF1        | ENSG00000163516  | 2  | 220084479 |           | 220111391 |           | 37     | 5      | 123834   | 2.1509 0.015743 0.721067335       |
| RGS7BP        | ENSG00000186479  | 5  | 63792084  | 63918139  | 138       | 18        | 123834 | 2.1481 | 0.015852 | 0.721837546                       |
| CLEC18A       | ENSG00000157322  | 16 | 69974810  | 70008141  | 11        | 4         | 123834 | 2.1477 | 0.01587  | 0.721837546                       |
| RPS19BP1      | ENSG00000187051  | 22 | 39915098  | 39938860  | 19        | 3         | 123834 | 2.1473 | 0.015886 | 0.721837546                       |
| PIDD          | ENSG00000177595  | 11 | 789179    | 819753    | 30        | 5         | 123834 | 2.1463 | 0.015923 | 0.721837546                       |
| NQO1          | ENSG00000181019  | 16 | 69730899  | 69770854  | 65        | 10        | 123834 | 2.1442 | 0.01601  | 0.721837546                       |
| EFCAB13       | ENSG00000178852  | 17 | 45390656  | 45528678  | 341       | 13        | 123834 | 2.1432 | 0.01605  | 0.721837546                       |
| OAS2          | ENSG00000111335  | 12 | 113406200 |           | 113459528 |           | 82     | 12     | 123834   | 2.1427 0.016068 0.721837546       |
| TENM4         | ENSG00000149256  | 11 | 78353876  | 79161992  | 1071      | 137       | 123834 | 2.1421 | 0.016091 | 0.721837546                       |
| S100A2        | ENSG00000196754  | 1  | 153523584 |           | 153550366 |           | 20     | 2      | 123834   | 2.14 0.016177 0.721837546         |
| HSPB1         | ENSG00000106211  | 7  | 75921861  | 75943612  | 29        | 5         | 123834 | 2.1387 | 0.01623  | 0.721837546                       |
| ARID2         | ENSG00000189079  | 12 | 46113448  | 46311823  | 81        | 8         | 123834 | 2.1385 | 0.016239 | 0.721837546                       |
| CALHM1        | ENSG00000185933  | 10 | 105203144 |           | 105228645 |           | 27     | 6      | 123834   | 2.1382 0.016252 0.721837546       |
| SETD7         | ENSG00000145391  | 4  | 140407095 |           | 140537853 |           | 116    | 27     | 123834   | 2.1362 0.016332 0.721837546       |
| ZC3H8         | ENSG00000144161  | 2  | 112959102 |           | 113022713 |           | 55     | 5      | 123834   | 2.1332 0.016454 0.721837546       |
| POU6F1        | ENSG00000184271  | 12 | 51570719  | 51621477  | 45        | 9         | 123834 | 2.1317 | 0.016516 | 0.721837546                       |
| C6orf48       | ENSG00000204387  | 6  | 31792385  | 31817541  | 43        | 15        | 123834 | 2.1314 | 0.016528 | 0.721837546                       |
| RAB44         | ENSG00000255587  | 6  | 36673256  | 36709870  | 64        | 13        | 123834 | 2.1312 | 0.016537 | 0.721837546                       |
| C17orf103     | ENSG00000154035  | 17 |           | 21132183  | 21166722  | 40        |        | 10     | 123834   | 2.1251 0.01679 0.721837546        |
| YWHAG         | ENSG00000170027  | 7  | 75946116  | 75998348  | 78        | 9         | 123834 | 2.1249 | 0.016798 | 0.721837546                       |
| NEU1          | ENSG00000204386  | 6  | 31815436  | 31840683  | 46        | 12        | 123834 | 2.1239 | 0.016838 | 0.721837546                       |
| GPSM3         | ENSG00000213654  | 6  | 32148543  | 32173300  | 24        | 8         | 123834 | 2.1231 | 0.016874 | 0.721837546                       |
| C5orf34       | ENSG00000172244  | 5  | 43476803  | 43525247  | 63        | 4         | 123834 | 2.123  | 0.016878 | 0.721837546                       |
| ZNF788        | ENSG00000188474  | 19 | 12193078  | 12235491  | 51        | 5         | 123834 | 2.1227 | 0.016888 | 0.721837546                       |
| SAMD15        | ENSG00000100583  | 14 | 77833032  | 77867840  | 55        | 7         | 123834 | 2.1225 | 0.016896 | 0.721837546                       |
| SV2B          | ENSG00000185518  | 15 | 91633180  | 91854539  | 306       | 32        | 123834 | 2.121  | 0.016961 | 0.721837546                       |
| SLC39A13      | ENSG00000165915  | 11 | 47418683  | 47448047  | 52        | 6         | 123834 | 2.1187 | 0.017058 | 0.721837546                       |
| PYDC2         | ENSG00000253548  | 3  | 191168952 |           | 191189245 |           | 118    | 6      | 123834   | 2.1185 0.017067 0.721837546       |
| KISS1         | ENSG00000170498  | 1  | 204149469 |           | 204175614 |           | 34     | 6      | 123834   | 2.1163 0.017161 0.721837546       |
| OTUD7B        | ENSG00000163113  | 1  | 149899705 |           | 149992625 |           | 74     | 5      | 123834   | 2.115 0.017217 0.721837546        |
| TRIM66        | ENSG00000166436  | 11 | 8623584   | 8703413   | 140       | 14        | 123834 | 2.1133 | 0.017286 | 0.721837546                       |
| ATP5J2        | ENSG00000241468  | 7  | 99036098  | 99073954  | 56        | 5         | 123834 | 2.1128 | 0.01731  | 0.721837546                       |
| PBX2          | ENSG00000204304  | 6  | 32142512  | 32167963  | 21        | 7         | 123834 | 2.1123 | 0.017329 | 0.721837546                       |
| PGAM2         | ENSG00000164708  | 7  | 44092326  | 44115186  | 45        | 4         | 123834 | 2.1118 | 0.017351 | 0.721837546                       |
| PGP           | ENSG00000184207  | 16 | 2251998   | 2274808   | 19        | 4         | 123834 | 2.1103 | 0.017415 | 0.721837546                       |
| CERS5         | ENSG00000139624  | 12 | 50513575  | 50571288  | 72        | 5         | 123834 | 2.11   | 0.017427 | 0.721837546                       |
| UBE2Q1        | ENSG00000160714  | 1  | 154511053 |           | 154541504 |           | 45     | 5      | 123834   | 2.1094 0.017456 0.721837546       |
| C2orf27A      | ENSG00000197927  | 2  | 132469948 |           | 132534973 |           | 132    | 9      | 123834   | 2.1087 0.017487 0.721837546       |
| RNF5          | ENSG00000204308  | 6  | 32136131  | 32161930  | 18        | 6         | 123834 | 2.1083 | 0.0175   | 0.721837546                       |
| AGER          | ENSG00000204305  | 6  | 32138745  | 32162101  | 18        | 6         | 123834 | 2.1083 | 0.0175   | 0.721837546                       |
| ARPC1B        | ENSG00000130429  | 7  | 98961872  | 99002424  | 56        | 6         | 123834 | 2.107  | 0.017559 | 0.721837546                       |
| KDM3B         | ENSG00000120733  | 5  | 137678285 |           | 137782717 |           | 182    | 16     | 123834   | 2.1067 0.017573 0.721837546       |
| PSMD9         | ENSG00000110801  | 12 | 122316637 |           | 122366203 |           | 104    | 11     | 123834   | 2.1053 0.017632 0.721837546       |
| PLEKH01       | ENSG000002023902 | 1  | 150111373 |           | 150146916 |           | 37     | 2      | 123834   | 2.1046 0.017663 0.721837546       |
| IL12RB2       | ENSG000000081985 | 1  | 67763047  | 67872583  | 192       | 15        | 123834 | 2.1042 | 0.01768  | 0.721837546                       |
| NEBL          | ENSG00000078114  | 10 | 21058902  | 21473116  | 578       | 46        | 123834 | 2.1042 | 0.01768  | 0.721837546                       |
| TEKT2         | ENSG00000092850  | 1  | 36539676  | 36563876  | 10        | 1         | 123834 | 2.104  | 0.017688 | 0.721837546                       |
| PLAC8L1       | ENSG00000173261  | 5  | 145453949 |           | 145493932 |           | 83     | 3      | 123834   | 2.1037 0.017703 0.721837546       |
| FOXN3         | ENSG00000053254  | 14 | 89581215  | 90095493  | 604       | 93        | 123834 | 2.1035 | 0.017711 | 0.721837546                       |
| SLC25A22      | ENSG00000177542  | 11 | 780475    | 808316    | 37        | 6         | 123834 | 2.1018 | 0.017784 | 0.721837546                       |
| LRRC3DN       | ENSG00000269430  | 21 | 45869814  | 45892078  | 50        | 5         | 123834 | 2.1018 | 0.017785 | 0.721837546                       |
| TACR1         | ENSG00000115353  | 2  | 75263590  | 75436826  | 197       | 33        | 123834 | 2.1006 | 0.017837 | 0.721837546                       |
| AUTS2         | ENSG00000158321  | 7  | 69053905  | 70268054  | 1560      | 51        | 123834 | 2.0997 | 0.017876 | 0.721837546                       |
| SERPINA5      | ENSG00000188488  | 14 | 95017779  | 95069457  | 203       | 24        | 123834 | 2.0955 | 0.018062 | 0.721837546                       |
| HIST1H2BD     | ENSG00000158373  | 6  |           | 26148349  | 26181577  | 26        |        | 8      | 123834   | 2.0947 0.0181 0.721837546         |
| AC003043.1    | ENSG00000268413  | 17 |           | 42325297  | 42365825  | 37        |        | 8      | 123834   | 2.0945 0.018107 0.721837546       |
| DLGAP3        | ENSG00000116544  | 1  | 35321037  | 35405186  | 20        | 4         | 123834 | 2.0942 | 0.018119 | 0.721837546                       |
| DDX19A        | ENSG00000168872  | 16 | 70370732  | 70417286  | 27        | 6         | 123834 | 2.0937 | 0.018142 | 0.721837546                       |
| ZNF668        | ENSG00000232748  | 16 | 31062813  | 31083451  | 23        | 3         | 123834 | 2.0934 | 0.018158 | 0.721837546                       |
| SPEF2         | ENSG00000152582  | 5  | 35607946  | 35824713  | 464       | 27        | 123834 | 2.0929 | 0.018178 | 0.721837546                       |
| MANBAL        | ENSG00000101363  | 20 | 35908041  | 35955663  | 54        | 7         | 123834 | 2.0926 | 0.018192 | 0.721837546                       |
| REG4          | ENSG00000134193  | 1  | 120326641 |           | 120364283 |           | 66     | 4      | 123834   | 2.0913 0.018252 0.721837546       |
| RPL4          | ENSG00000174444  | 15 | 66780355  | 66826870  | 96        | 11        | 123834 | 2.0911 | 0.018261 | 0.721837546                       |
| MRPS21        | ENSG00000187145  | 1  | 150256289 |           | 150291414 |           | 73     | 6      | 123834   | 2.0907 0.018277 0.721837546       |
| NVL           | ENSG00000143748  | 1  | 224405036 |           | 224528089 |           | 138    | 6      | 123834   | 2.0894 0.018337 0.721837546       |
| TMEM88        | ENSG00000167874  | 17 | 7748383   | 7769417   | 19        | 5         | 123834 | 2.0893 | 0.018342 | 0.721837546                       |
| AC073063.1    | ENSG00000214314  | 7  |           | 99030552  | 99050747  | 32        |        | 4      | 123834   | 2.0891 0.01835 0.721837546        |
| ADRBK1        | ENSG00000173020  | 11 | 67023881  | 67064027  | 26        | 5         | 123834 | 2.0887 | 0.018369 | 0.721837546                       |
| BTBD3         | ENSG00000132640  | 20 | 11861371  | 11917257  | 102       | 6         | 123834 | 2.0866 | 0.018461 | 0.721837546                       |
| NRF1          | ENSG00000106459  | 7  | 129241555 |           | 129406922 |           | 312    | 20     | 123834   | 2.0864 0.018469 0.721837546       |
| ZC2HC1A       | ENSG00000104427  | 8  | 79568282  | 79642000  | 127       | 9         | 123834 | 2.0863 | 0.018473 | 0.721837546                       |
| TMEM56        | ENSG00000152078  | 1  | 95572894  | 95673163  | 174       | 19        | 123834 | 2.0863 | 0.018476 | 0.721837546                       |

|               |                 |    |           |          |           |    |        |        |          |                      |                      |
|---------------|-----------------|----|-----------|----------|-----------|----|--------|--------|----------|----------------------|----------------------|
| PHC2          | ENSG00000134686 | 1  | 33779224  | 33906653 | 296       | 16 | 123834 | 2.0805 | 0.018741 | 0.726548505          |                      |
| YEATS2        | ENSG00000163872 | 3  | 183405606 |          | 183540413 |    | 172    | 9      | 123834   | 2.0762               | 0.018938 0.726548505 |
| UBLCP1        | ENSG00000164332 | 5  | 158680089 |          | 158723044 |    | 49     | 7      | 123834   | 2.0747               | 0.019008 0.726548505 |
| RP11-131H24.4 | ENSG00000258987 | 14 | 94395901  | 94420475 | 48        |    | 5      | 123834 | 2.0733   | 0.019073 0.726548505 |                      |
| LAG3          | ENSG00000089692 | 12 | 6871678   | 6897621  | 6         | 3  | 123834 | 2.0726 | 0.019103 | 0.726548505          |                      |
| CNE7          | ENSG00000178773 | 16 | 89632176  | 89673654 | 55        | 12 | 123834 | 2.0716 | 0.019153 | 0.726548505          |                      |
| BCDIN3D       | ENSG00000186666 | 12 | 50221573  | 50246912 | 27        | 5  | 123834 | 2.0715 | 0.019155 | 0.726548505          |                      |
| IL17RE        | ENSG00000163701 | 3  | 9934296   | 9968086  | 48        | 3  | 123834 | 2.0707 | 0.019195 | 0.726548505          |                      |
| TDRD10        | ENSG00000163239 | 1  | 154464695 |          | 154530623 |    | 150    | 7      | 123834   | 2.0704               | 0.019209 0.726548505 |
| HOXA3         | ENSG00000105997 | 7  | 27135803  | 27202200 | 103       | 12 | 123834 | 2.0703 | 0.019213 | 0.726548505          |                      |
| SCNM1         | ENSG00000163156 | 1  | 151119140 |          | 151152773 |    | 10     | 4      | 123834   | 2.0698               | 0.019238 0.726548505 |
| HOXB3         | ENSG00000120093 | 17 | 46616232  | 46692274 | 122       | 20 | 123834 | 2.0697 | 0.019239 | 0.726548505          |                      |
| FUT4          | ENSG00000196371 | 11 | 94267017  | 94293063 | 33        | 6  | 123834 | 2.0697 | 0.01924  | 0.726548505          |                      |
| TRAF2         | ENSG00000127191 | 9  | 139766364 |          | 139831059 |    | 85     | 3      | 123834   | 2.0695               | 0.019249 0.726548505 |
| AASS          | ENSG00000008311 | 7  | 121705701 |          | 121794334 |    | 108    | 12     | 123834   | 2.0689               | 0.019279 0.726548505 |
| HSD17B13      | ENSG00000170509 | 4  | 88214941  | 88254058 | 66        | 11 | 123834 | 2.068  | 0.019322 | 0.726548505          |                      |
| VWA7          | ENSG00000204396 | 6  | 31723367  | 31755108 | 28        | 9  | 123834 | 2.0662 | 0.019407 | 0.726548505          |                      |
| ZNF789        | ENSG00000198556 | 7  | 99060464  | 99111273 | 46        | 7  | 123834 | 2.0662 | 0.019407 | 0.726548505          |                      |
| PRMT7         | ENSG00000132600 | 16 | 68334877  | 68402466 | 130       | 9  | 123834 | 2.0651 | 0.019458 | 0.726548505          |                      |
| PLEKHO2       | ENSG00000241839 | 15 | 65124088  | 65170206 | 112       | 8  | 123834 | 2.064  | 0.019511 | 0.726548505          |                      |
| TUBB3         | ENSG00000198211 | 16 | 89975573  | 90012500 | 86        | 12 | 123834 | 2.0621 | 0.019599 | 0.726548505          |                      |
| Clorf61       | ENSG00000125462 | 1  | 156364042 |          | 156410493 |    | 22     | 6      | 123834   | 2.0618               | 0.019611 0.726548505 |
| CRB1          | ENSG00000134376 | 1  | 197160592 |          | 197457585 |    | 251    | 26     | 123834   | 2.0619               | 0.019611 0.726548505 |
| 4-Mar         | ENSG00000144583 | 2  | 217112588 |          | 217246750 |    | 151    | 21     | 123834   | 2.0616               | 0.019625 0.726548505 |
| PDDC1         | ENSG00000177225 | 11 | 757220    | 787488   | 34        | 7  | 123834 | 2.0605 | 0.019676 | 0.726548505          |                      |
| PPARGC1A      | ENSG00000109819 | 4  | 23746664  | 23915712 | 273       | 44 | 123834 | 2.0603 | 0.019685 | 0.726548505          |                      |
| ARPC1A        | ENSG00000241685 | 7  | 98913521  | 98995787 | 118       | 10 | 123834 | 2.058  | 0.019795 | 0.729192558          |                      |
| GIP           | ENSG00000159224 | 17 | 47025916  | 47055958 | 69        | 7  | 123834 | 2.0566 | 0.01986  | 0.730171915          |                      |
| HPS5          | ENSG00000110756 | 11 | 18290223  | 18353745 | 112       | 12 | 123834 | 2.0547 | 0.019953 | 0.731972809          |                      |
| WFIKKN1       | ENSG00000127578 | 16 | 669239    | 694116   | 35        | 5  | 123834 | 2.054  | 0.019986 | 0.731972809          |                      |
| CUEDC1        | ENSG00000180891 | 17 | 55928604  | 56042684 | 105       | 24 | 123834 | 2.0525 | 0.020061 | 0.732225958          |                      |
| ANKDD1A       | ENSG00000166839 | 15 | 65194101  | 65261042 | 94        | 13 | 123834 | 2.0515 | 0.020107 | 0.732225958          |                      |
| DNAJC10       | ENSG00000077232 | 2  | 183570999 |          | 183669191 |    | 121    | 6      | 123834   | 2.0509               | 0.020136 0.732225958 |
| EPN1          | ENSG00000063245 | 19 | 56176592  | 56231224 | 97        | 14 | 123834 | 2.0507 | 0.020147 | 0.732225958          |                      |
| MBP           | ENSG00000197971 | 18 | 74680783  | 74855639 | 305       | 62 | 123834 | 2.0499 | 0.020187 | 0.732279573          |                      |
| PPT2-EGFL8    | ENSG00000258388 | 6  | 32111622  | 32149755 | 34        |    | 8      | 123834 | 2.0474   | 0.02031              | 0.733866305          |
| TSSK4         | ENSG00000139908 | 14 | 24664903  | 24687568 | 25        | 6  | 123834 | 2.0471 | 0.020326 | 0.733866305          |                      |
| SAMD4A        | ENSG0000020577  | 14 | 55023815  | 55270033 | 286       | 55 | 123834 | 2.0451 | 0.020424 | 0.733866305          |                      |
| CLTC          | ENSG00000141367 | 17 | 57687219  | 57783671 | 105       | 6  | 123834 | 2.0447 | 0.020441 | 0.733866305          |                      |
| Cl3orf45      | ENSG00000178734 | 13 | 76435187  | 76467947 | 72        | 13 | 123834 | 2.0437 | 0.020493 | 0.733866305          |                      |
| GBP6          | ENSG00000183347 | 1  | 89819617  | 89862020 | 77        | 9  | 123834 | 2.0436 | 0.020498 | 0.733866305          |                      |
| CEBPZ         | ENSG00000115816 | 2  | 37418755  | 37468856 | 60        | 12 | 123834 | 2.0435 | 0.020501 | 0.733866305          |                      |
| DNAJB2        | ENSG00000135924 | 2  | 220133989 |          | 220161622 |    | 20     | 5      | 123834   | 2.0423               | 0.02056 0.734215205  |
| DBNL          | ENSG00000136279 | 7  | 44074239  | 44119055 | 79        | 5  | 123834 | 2.0417 | 0.020588 | 0.734215205          |                      |
| LARS          | ENSG00000133706 | 5  | 145482601 |          | 145572223 |    | 266    | 4      | 123834   | 2.0391               | 0.020718 0.736195828 |
| SRP68         | ENSG00000167881 | 17 | 74025184  | 74078734 | 43        | 2  | 123834 | 2.0391 | 0.020721 | 0.736195828          |                      |
| CHMP4A        | ENSG00000254505 | 14 | 24668789  | 24693075 | 25        | 6  | 123834 | 2.0362 | 0.020867 | 0.736671549          |                      |
| CCDC37        | ENSG00000163885 | 3  | 126103782 |          | 126165399 |    | 104    | 18     | 123834   | 2.036                | 0.020877 0.736671549 |
| GALR2         | ENSG00000182687 | 17 | 74060875  | 74083622 | 10        | 1  | 123834 | 2.0348 | 0.020935 | 0.736671549          |                      |
| MLLT3         | ENSG00000171843 | 9  | 20331663  | 20632542 | 203       | 31 | 123834 | 2.0345 | 0.02095  | 0.736671549          |                      |
| 2-Sep         | ENSG00000168385 | 2  | 242244515 |          | 242303442 |    | 109    | 12     | 123834   | 2.0337               | 0.020992 0.736671549 |
| VIPAS39       | ENSG00000151445 | 14 | 77883018  | 77934295 | 70        | 7  | 123834 | 2.0325 | 0.021054 | 0.736671549          |                      |
| KIF13A        | ENSG00000137177 | 6  | 17749414  | 17997854 | 396       | 20 | 123834 | 2.0281 | 0.021273 | 0.736671549          |                      |
| DNPEP         | ENSG00000123992 | 2  | 220228268 |          | 220274744 |    | 62     | 7      | 123834   | 2.0279               | 0.021287 0.736671549 |
| EFCAB10       | ENSG00000185055 | 7  | 105195567 |          | 105251322 |    | 48     | 8      | 123834   | 2.0267               | 0.021346 0.736671549 |
| SH3RF1        | ENSG00000154447 | 4  | 170005407 |          | 170202256 |    | 303    | 22     | 123834   | 2.0254               | 0.021413 0.736671549 |
| SOX6          | ENSG00000110693 | 11 | 15977995  | 16771138 | 941       | 38 | 123834 | 2.025  | 0.021433 | 0.736671549          |                      |
| ZNF788        | ENSG00000214189 | 19 | 12193078  | 12258050 | 75        | 7  | 123834 | 2.0239 | 0.02149  | 0.736671549          |                      |
| GGT7          | ENSG00000131067 | 20 | 33422523  | 33470663 | 59        | 6  | 123834 | 2.0239 | 0.02149  | 0.736671549          |                      |
| TRIM73        | ENSG00000178809 | 7  | 75014337  | 75050279 | 1         | 1  | 123834 | 2.0229 | 0.021541 | 0.736671549          |                      |
| MYEOV         | ENSG00000172927 | 11 | 69051605  | 69192494 | 121       | 19 | 123834 | 2.0226 | 0.021557 | 0.736671549          |                      |
| MDP1          | ENSG00000213920 | 14 | 24673143  | 24695276 | 25        | 5  | 123834 | 2.0212 | 0.021628 | 0.736671549          |                      |
| LRRC3         | ENSG00000160233 | 21 | 45865369  | 45888739 | 63        | 5  | 123834 | 2.0208 | 0.021652 | 0.736671549          |                      |
| DECR2         | ENSG00000242612 | 16 | 441826    | 472487   | 25        | 3  | 123834 | 2.0206 | 0.021662 | 0.736671549          |                      |
| HOXA9         | ENSG00000078399 | 7  | 27192054  | 27220117 | 22        | 6  | 123834 | 2.0205 | 0.021668 | 0.736671549          |                      |
| HOXB2         | ENSG00000173917 | 17 | 46608256  | 46633441 | 43        | 6  | 123834 | 2.0203 | 0.021677 | 0.736671549          |                      |
| MAP6D1        | ENSG00000180834 | 3  | 183523664 |          | 183553382 |    | 46     | 4      | 123834   | 2.019                | 0.021742 0.736671549 |
| LHX3          | ENSG00000107187 | 9  | 139078096 |          | 139106955 |    | 30     | 8      | 123834   | 2.0183               | 0.021778 0.736671549 |
| NLRP9         | ENSG00000185792 | 19 | 56209798  | 56259768 | 54        | 14 | 123834 | 2.0177 | 0.021811 | 0.736671549          |                      |
| RP11-87C12.2  | ENSG00000256950 | 12 | 122316715 |          | 122369376 |    | 116    | 12     | 123834   | 2.0176               | 0.021818 0.736671549 |
| GYLTL1B       | ENSG00000165905 | 11 | 45933172  | 45960647 | 21        | 4  | 123834 | 2.017  | 0.021849 | 0.736671549          |                      |
| COX18         | ENSG00000163626 | 4  | 73911797  | 73945472 | 18        | 4  | 123834 | 2.0169 | 0.021855 | 0.736671549          |                      |
| BRICD5        | ENSG00000182685 | 16 | 2249254   | 2271951  | 24        | 5  | 123834 | 2.016  | 0.021902 | 0.736671549          |                      |
| C18orf56      | ENSG00000176912 | 18 | 631320    | 668340   | 41        | 8  | 123834 | 2.0144 | 0.021982 | 0.736671549          |                      |
| SIGLEC15      | ENSG00000197046 | 18 | 43395477  | 43434045 | 41        | 6  | 123834 | 2.014  | 0.022007 | 0.736671549          |                      |
| SH3D21        | ENSG00000214193 | 1  | 36761988  | 36800484 | 27        | 3  | 123834 | 2.0129 | 0.022061 | 0.736671549          |                      |
| SFTA3         | ENSG00000229415 | 14 | 36932493  | 36993034 | 26        | 8  | 123834 | 2.0127 | 0.022075 | 0.736671549          |                      |
| SYNGR4        | ENSG00000105467 | 19 | 48857652  | 48889633 | 35        | 8  | 123834 | 2.0091 | 0.022264 | 0.736671549          |                      |
| NEDD8         | ENSG00000129559 | 14 | 24676058  | 24711660 | 27        | 5  | 123834 | 2.0089 | 0.022275 | 0.736671549          |                      |
| CDH19         | ENSG00000071991 | 18 | 64158320  | 64281375 | 154       | 15 | 123834 | 2.0083 | 0.022306 | 0.736671549          |                      |
| BP1FC         | ENSG00000184459 | 22 | 32799834  | 32870471 | 153       | 32 | 123834 | 2.0082 | 0.02231  | 0.736671549          |                      |
| STK33         | ENSG00000130413 | 11 | 8403418   | 8625836  | 619       | 20 | 123834 | 2.0069 | 0.022379 | 0.736671549          |                      |
| SLC45A4       | ENSG0000022567  | 8  | 142207265 |          | 142328404 |    | 230    | 34     | 123834   | 2.0066               | 0.022394 0.736671549 |
| EFR3A         | ENSG00000132294 | 8  | 132906335 |          | 133035889 |    | 291    | 16     | 123834   | 2.0058               | 0.022436 0.736671549 |
| HIST3H2A      | ENSG00000181218 | 1  | 228635065 |          | 228655560 |    | 19     | 3      | 123834   | 2.0054               | 0.022458 0.736671549 |
| HIST3H2BB     | ENSG00000196890 | 1  | 228635808 |          | 228656259 |    | 19     | 3      | 123834   | 2.0054               | 0.022458 0.736671549 |
| BTN2A1        | ENSG00000112763 | 6  | 26448150  | 26486849 | 73        | 12 | 123834 | 2.0052 | 0.022471 | 0.736671549          |                      |
| SVOP1         | ENSG00000157703 | 7  | 138269030 |          | 138396097 |    | 159    | 28     | 123834   | 2.0033               | 0.022571 0.736671549 |
| REEP6         | ENSG00000115255 | 19 | 1481165   | 1507926  | 27        | 4  | 123834 | 2.0017 | 0.022661 | 0.736671549          |                      |
| GPAM          | ENSG00000119927 | 10 | 113899624 |          | 113985135 |    | 103    | 11     | 123834   | 2.0012               | 0.022684 0.736671549 |
| NOXRED1       | ENSG00000165555 | 14 | 77850364  | 77899860 | 74        | 7  | 123834 | 2.0005 | 0.022721 | 0.736671549          |                      |
| IMPDH2        | ENSG00000178035 | 3  | 49051758  | 49076841 | 8         | 2  | 123834 | 2.0002 | 0.022738 | 0.736671549          |                      |
| TBCEL         | ENSG00000154114 | 11 | 120884781 |          | 120971484 |    | 62     | 5      | 123834   | 2.0002               | 0.022738 0.736671549 |

|                |                 |    |           |           |           |    |        |        |          |             |             |             |
|----------------|-----------------|----|-----------|-----------|-----------|----|--------|--------|----------|-------------|-------------|-------------|
| CTSE           | ENSG00000196188 | 1  | 206307459 | 206342104 | 6         | 1  | 123834 | 1.9938 | 0.023087 | 0.736671549 |             |             |
| TIFAB          | ENSG00000255833 | 5  | 134769908 | 134798089 | 68        | 10 | 123834 | 1.9937 | 0.023092 | 0.736671549 |             |             |
| SPTBN4         | ENSG00000160460 | 19 | 40962148  | 41092370  | 105       | 17 | 123834 | 1.9932 | 0.023118 | 0.736671549 |             |             |
| AARS           | ENSG00000090861 | 16 | 70276198  | 70333446  | 16        | 6  | 123834 | 1.9929 | 0.023134 | 0.736671549 |             |             |
| GOLTI1A        | ENSG00000174567 | 1  | 204157288 | 204193220 | 44        | 9  | 123834 | 1.9911 | 0.023237 | 0.736671549 |             |             |
| ZMYND11        | ENSG0000015171  | 10 | 170405    | 310577    | 155       | 13 | 123834 | 1.9905 | 0.023269 | 0.736671549 |             |             |
| ULK2           | ENSG00000083290 | 17 | 19664142  | 19781249  | 116       | 2  | 123834 | 1.9903 | 0.023278 | 0.736671549 |             |             |
| SESN3          | ENSG00000149212 | 11 | 94888704  | 94975705  | 41        | 6  | 123834 | 1.9901 | 0.023289 | 0.736671549 |             |             |
| RP1-170019.20  | ENSG00000257184 |    | 7         | 27193154  | 27229632  | 23 | 6      | 123834 | 1.9894   | 0.023326    | 0.736671549 |             |
| TUBGCP3        | ENSG00000126216 | 13 | 113129325 | 113252481 | 242       | 12 | 123834 | 1.9893 | 0.023332 | 0.736671549 |             |             |
| ABCC5          | ENSG00000114770 | 3  | 183627722 | 183745803 | 223       | 15 | 123834 | 1.9891 | 0.023346 | 0.736671549 |             |             |
| SV2A           | ENSG00000159164 | 1  | 149864870 | 149899434 | 37        | 2  | 123834 | 1.9875 | 0.023432 | 0.736671549 |             |             |
| IGSF5          | ENSG00000183067 | 21 | 41107334  | 41184023  | 285       | 14 | 123834 | 1.9872 | 0.023452 | 0.736671549 |             |             |
| MRPL28         | ENSG00000086504 | 16 | 407384    | 430527    | 71        | 9  | 123834 | 1.9863 | 0.0235   | 0.736671549 |             |             |
| AP006621.5     | ENSG00000255284 |    | 11        | 767578    | 794297    | 31 | 6      | 123834 | 1.986    | 0.023514    | 0.736671549 |             |
| SLC4A4         | ENSG00000080493 | 4  | 72043003  | 72447804  | 404       | 27 | 123834 | 1.9856 | 0.023539 | 0.736671549 |             |             |
| SRRD           | ENSG00000100104 | 22 | 26869843  | 26900624  | 54        | 8  | 123834 | 1.9845 | 0.0236   | 0.736671549 |             |             |
| C9orf153       | ENSG00000187753 | 9  | 88825180  | 88884572  | 76        | 13 | 123834 | 1.9845 | 0.023602 | 0.736671549 |             |             |
| C7orf69        | ENSG00000136275 | 7  | 47824889  | 47869445  | 79        | 12 | 123834 | 1.9843 | 0.023614 | 0.736671549 |             |             |
| CCNC           | ENSG00000112237 | 6  | 99980256  | 100026849 | 110       | 11 | 123834 | 1.9833 | 0.023665 | 0.736671549 |             |             |
| AC023469.1     | ENSG00000222031 |    | 2         | 151847734 | 151915288 |    | 136    | 12     | 123834   | 1.9822      | 0.023729    | 0.736671549 |
| FKSG61         | ENSG00000268156 | 14 | 77872741  | 77893115  | 31        | 5  | 123834 | 1.9818 | 0.023748 | 0.736671549 |             |             |
| AC022498.1     | ENSG00000213132 |    | 3         | 187886331 | 187908598 |    | 40     | 11     | 123834   | 1.9818      | 0.023753    | 0.736671549 |
| AFTPH          | ENSG00000119844 | 2  | 64741465  | 64830139  | 104       | 4  | 123834 | 1.9815 | 0.02377  | 0.736671549 |             |             |
| MON2           | ENSG00000061987 | 12 | 62850597  | 63001363  | 297       | 15 | 123834 | 1.9799 | 0.023856 | 0.736671549 |             |             |
| ARL6IP6        | ENSG00000177917 | 2  | 153564407 | 153627767 | 82        | 10 | 123834 | 1.9776 | 0.023988 | 0.736671549 |             |             |
| AC062017.1     | ENSG00000222020 |    | 2         | 240313130 | 240334058 |    | 11     | 4      | 123834   | 1.9775      | 0.023993    | 0.736671549 |
| REFIN1         | ENSG00000214022 | 7  | 150055278 | 150081133 | 33        | 4  | 123834 | 1.9774 | 0.023997 | 0.736671549 |             |             |
| UNC45B         | ENSG00000141161 | 17 | 33464836  | 33526364  | 70        | 12 | 123834 | 1.9736 | 0.024212 | 0.736671549 |             |             |
| LCE6A          | ENSG00000235942 | 1  | 152805344 | 152826459 | 9         | 2  | 123834 | 1.9729 | 0.024251 | 0.736671549 |             |             |
| SMIM13         | ENSG00000224531 | 6  | 11084266  | 11148964  | 140       | 11 | 123834 | 1.9728 | 0.024259 | 0.736671549 |             |             |
| GPD1           | ENSG00000167588 | 12 | 50487602  | 50515102  | 30        | 3  | 123834 | 1.9728 | 0.02426  | 0.736671549 |             |             |
| NME7           | ENSG00000143156 | 1  | 169091769 | 169347205 | 787       | 19 | 123834 | 1.9727 | 0.024263 | 0.736671549 |             |             |
| POLM           | ENSG00000122678 | 7  | 44101846  | 44132139  | 47        | 3  | 123834 | 1.9724 | 0.024283 | 0.736671549 |             |             |
| FEN1           | ENSG00000168496 | 11 | 61550109  | 61574716  | 9         | 2  | 123834 | 1.9723 | 0.024286 | 0.736671549 |             |             |
| ZNF620         | ENSG00000177842 | 3  | 40537483  | 40570227  | 24        | 4  | 123834 | 1.9719 | 0.024311 | 0.736671549 |             |             |
| DUXA           | ENSG00000258873 | 19 | 57655389  | 57688811  | 56        | 7  | 123834 | 1.9712 | 0.02435  | 0.736671549 |             |             |
| MGST2          | ENSG00000085871 | 4  | 140576922 | 140671899 | 147       | 29 | 123834 | 1.9704 | 0.024394 | 0.736671549 |             |             |
| ZBTB18         | ENSG00000179456 | 1  | 244204585 | 244230778 | 6         | 3  | 123834 | 1.9703 | 0.024401 | 0.736671549 |             |             |
| SHE            | ENSG00000169291 | 1  | 154432248 | 154484589 | 65        | 6  | 123834 | 1.97   | 0.024418 | 0.736671549 |             |             |
| MED23          | ENSG00000112282 | 6  | 131885106 | 131959369 | 52        | 9  | 123834 | 1.9692 | 0.024463 | 0.736671549 |             |             |
| TSPAN19        | ENSG00000231738 | 12 | 85398094  | 85440055  | 10        | 2  | 123834 | 1.9692 | 0.024467 | 0.736671549 |             |             |
| OR13A1         | ENSG00000256574 | 10 | 45788102  | 45821056  | 116       | 6  | 123834 | 1.9691 | 0.024473 | 0.736671549 |             |             |
| ACP2           | ENSG00000134575 | 11 | 47250853  | 47280457  | 63        | 6  | 123834 | 1.9682 | 0.024524 | 0.736671549 |             |             |
| NEDD8-MDP1     | ENSG00000255526 |    | 14        | 24673161  | 24711558  | 31 | 6      | 123834 | 1.9676   | 0.024554    | 0.736671549 |             |
| IQCF2          | ENSG00000184345 | 3  | 51885645  | 51907440  | 58        | 5  | 123834 | 1.9659 | 0.024654 | 0.736671549 |             |             |
| CTU1           | ENSG00000142544 | 19 | 51590863  | 51621627  | 17        | 5  | 123834 | 1.9644 | 0.02474  | 0.736671549 |             |             |
| ST3GAL2        | ENSG00000157350 | 16 | 70403338  | 70483140  | 31        | 7  | 123834 | 1.9644 | 0.024742 | 0.736671549 |             |             |
| FNBP4          | ENSG00000109920 | 11 | 47728072  | 47798995  | 103       | 8  | 123834 | 1.9643 | 0.024745 | 0.736671549 |             |             |
| TPD52L2        | ENSG00000101150 | 20 | 62486596  | 62532898  | 65        | 7  | 123834 | 1.964  | 0.024763 | 0.736671549 |             |             |
| SERPINA4       | ENSG00000100665 | 14 | 95017428  | 95046250  | 86        | 11 | 123834 | 1.964  | 0.024765 | 0.736671549 |             |             |
| TDRD1          | ENSG00000095627 | 10 | 115929029 | 116002063 | 124       | 9  | 123834 | 1.9603 | 0.024978 | 0.7418466   |             |             |
| DUSP16         | ENSG00000111266 | 12 | 12618829  | 12725317  | 134       | 16 | 123834 | 1.9579 | 0.025122 | 0.744959401 |             |             |
| ZNF20          | ENSG00000132010 | 19 | 12193658  | 12261222  | 75        | 7  | 123834 | 1.956  | 0.025233 | 0.746248759 |             |             |
| GLB1L          | ENSG00000163521 | 2  | 220091328 | 220120200 | 37        | 4  | 123834 | 1.9558 | 0.025244 | 0.746248759 |             |             |
| LRRIQ1         | ENSG00000133640 | 12 | 85420092  | 85667002  | 196       | 10 | 123834 | 1.953  | 0.025409 | 0.748874006 |             |             |
| ZNF394         | ENSG00000160908 | 7  | 99074142  | 99107947  | 26        | 5  | 123834 | 1.9524 | 0.025447 | 0.748874006 |             |             |
| RTCB           | ENSG00000100220 | 22 | 32773569  | 32818242  | 134       | 20 | 123834 | 1.9523 | 0.025451 | 0.748874006 |             |             |
| TMIGD2         | ENSG00000167664 | 19 | 4282229   | 4312428   | 24        | 6  | 123834 | 1.9508 | 0.025541 | 0.749190508 |             |             |
| SLC26A1        | ENSG00000145217 | 4  | 962861    | 997228    | 51        | 10 | 123834 | 1.9506 | 0.025551 | 0.749190508 |             |             |
| B3GALNT2       | ENSG00000162885 | 1  | 235603238 | 235677781 | 140       | 12 | 123834 | 1.9501 | 0.02558  | 0.749190508 |             |             |
| MAP2K1         | ENSG00000169032 | 15 | 66669155  | 66794650  | 293       | 16 | 123834 | 1.9486 | 0.025671 | 0.750235279 |             |             |
| FAM114A1       | ENSG00000197712 | 4  | 38859298  | 38957360  | 217       | 15 | 123834 | 1.9466 | 0.025793 | 0.750235279 |             |             |
| COCH           | ENSG00000100473 | 14 | 31333720  | 31374271  | 32        | 11 | 123834 | 1.9461 | 0.025822 | 0.750235279 |             |             |
| C2CD5          | ENSG00000111731 | 12 | 22591517  | 22707480  | 141       | 3  | 123834 | 1.9449 | 0.025895 | 0.750235279 |             |             |
| SPATA4         | ENSG00000150628 | 4  | 177095789 | 177126822 | 55        | 11 | 123834 | 1.9445 | 0.025918 | 0.750235279 |             |             |
| RAB22A         | ENSG00000124209 | 20 | 56874752  | 56952563  | 155       | 16 | 123834 | 1.9442 | 0.025933 | 0.750235279 |             |             |
| ADH5           | ENSG00000197894 | 4  | 99982132  | 100019952 | 131       | 11 | 123834 | 1.9429 | 0.026012 | 0.750235279 |             |             |
| SPEG           | ENSG00000072195 | 2  | 220289568 | 220373009 | 52        | 7  | 123834 | 1.9428 | 0.02602  | 0.750235279 |             |             |
| EMCN           | ENSG00000164035 | 4  | 101306498 | 101811283 | 1162      | 42 | 123834 | 1.9421 | 0.026065 | 0.750235279 |             |             |
| ABCC10         | ENSG00000124574 | 6  | 43385104  | 43428168  | 63        | 10 | 123834 | 1.9409 | 0.026135 | 0.750235279 |             |             |
| ELAVL4         | ENSG00000162374 | 1  | 50503686  | 50679458  | 134       | 17 | 123834 | 1.9405 | 0.026161 | 0.750235279 |             |             |
| CIQTNF4        | ENSG00000172247 | 11 | 47601216  | 47626211  | 22        | 6  | 123834 | 1.9404 | 0.026164 | 0.750235279 |             |             |
| MCOLN1         | ENSG00000090674 | 19 | 7577512   | 7608895   | 12        | 4  | 123834 | 1.9403 | 0.026173 | 0.750235279 |             |             |
| PTK2B          | ENSG00000120899 | 8  | 27158999  | 27326903  | 313       | 17 | 123834 | 1.9397 | 0.026208 | 0.750235279 |             |             |
| GPR27          | ENSG00000170837 | 3  | 71793201  | 71815647  | 15        | 5  | 123834 | 1.9391 | 0.026243 | 0.750235279 |             |             |
| LMX1A          | ENSG00000162761 | 1  | 165161104 | 165335952 | 255       | 32 | 123834 | 1.9382 | 0.026297 | 0.750235279 |             |             |
| ITIH3          | ENSG00000162267 | 3  | 52818784  | 52853025  | 41        | 5  | 123834 | 1.937  | 0.026374 | 0.750235279 |             |             |
| RNF19B         | ENSG00000116514 | 1  | 33392046  | 33440286  | 58        | 5  | 123834 | 1.9363 | 0.026414 | 0.750235279 |             |             |
| KCTD13         | ENSG00000174943 | 16 | 29906333  | 29948356  | 30        | 3  | 123834 | 1.936  | 0.026437 | 0.750235279 |             |             |
| TMEM239        | ENSG00000241690 | 20 | 2785614   | 2808712   | 8         | 3  | 123834 | 1.9352 | 0.026484 | 0.750235279 |             |             |
| TMEM239        | ENSG00000198326 | 20 | 2785614   | 2810930   | 8         | 3  | 123834 | 1.9352 | 0.026484 | 0.750235279 |             |             |
| C20orf141      | ENSG00000258713 |    | 20        | 2785633   | 2806479   | 8  | 3      | 123834 | 1.9352   | 0.026484    | 0.750235279 |             |
| PDAP1          | ENSG00000106244 | 7  | 98979671  | 99016452  | 45        | 5  | 123834 | 1.9334 | 0.026592 | 0.751351834 |             |             |
| ATP4A          | ENSG00000105675 | 19 | 36030945  | 36064560  | 42        | 11 | 123834 | 1.9332 | 0.026605 | 0.751351834 |             |             |
| TNFSF14        | ENSG00000125735 | 19 | 6653148   | 6680599   | 17        | 5  | 123834 | 1.9326 | 0.026642 | 0.751351834 |             |             |
| CENPBD1        | ENSG00000177946 | 16 | 90026206  | 90048942  | 70        | 11 | 123834 | 1.9298 | 0.026814 | 0.75508224  |             |             |
| PCSK4          | ENSG00000115257 | 19 | 1471427   | 1500751   | 27        | 5  | 123834 | 1.9283 | 0.026908 | 0.755085102 |             |             |
| DHODH          | ENSG00000102967 | 16 | 72032487  | 72068954  | 63        | 11 | 123834 | 1.9275 | 0.026958 | 0.755085102 |             |             |
| FAM111B        | ENSG00000189057 | 11 | 58864658  | 58904883  | 30        | 3  | 123834 | 1.9275 | 0.02696  | 0.755085102 |             |             |
| DES            | ENSG00000175084 | 2  | 220273099 | 220301461 | 16        | 3  | 123834 | 1.9273 | 0.026973 | 0.755085102 |             |             |
| CLDN8          | ENSG00000156284 | 21 | 31576324  | 31598391  | 35        | 10 | 123834 | 1.9249 | 0.027123 | 0.757472987 |             |             |
| SLC16A6        | ENSG00000108932 | 17 | 66253167  | 66297408  | 33        | 7  | 123834 | 1.9246 | 0.027138 | 0.757472987 |             |             |
| ZNF322         | ENSG00000181315 | 6  | 26626518  | 26669980  | 88        | 9  | 123834 | 1.9227 | 0.027259 | 0.758857846 |             |             |
| CTD-2207023.10 | ENSG00000268614 |    | 19        | 7588481   | 7614945   | 22 | 4      | 123834 | 1.9219   | 0.027312    | 0.758857846 |             |
| STAP2          | ENSG00000178078 | 19 | 4314040   | 43252     |           |    |        |        |          |             |             |             |

|               |                  |    |           |           |      |    |        |        |          |             |
|---------------|------------------|----|-----------|-----------|------|----|--------|--------|----------|-------------|
| SEMA6C        | ENSG00000143434  | 1  | 151094161 | 151129104 | 36   | 6  | 123834 | 1.9188 | 0.027507 | 0.758857846 |
| CXXC5         | ENSG00000171604  | 5  | 139016884 | 139073467 | 38   | 5  | 123834 | 1.9188 | 0.027507 | 0.758857846 |
| PEX16         | ENSG00000121680  | 11 | 45921220  | 45950363  | 15   | 3  | 123834 | 1.9171 | 0.027613 | 0.759469292 |
| AHSA1         | ENSG00000100591  | 14 | 77914213  | 77945817  | 40   | 7  | 123834 | 1.9164 | 0.027656 | 0.759469292 |
| EGFL8         | ENSG00000241404  | 6  | 32122360  | 32146058  | 23   | 7  | 123834 | 1.9153 | 0.02773  | 0.759469292 |
| ZNF124        | ENSG00000196418  | 1  | 247275277 | 247345318 | 147  | 14 | 123834 | 1.915  | 0.027747 | 0.759469292 |
| VPS9D1        | ENSG00000075399  | 16 | 89763542  | 89797394  | 41   | 12 | 123834 | 1.9141 | 0.027806 | 0.759469292 |
| FAM163B       | ENSG00000196990  | 9  | 136434079 | 136461319 | 32   | 6  | 123834 | 1.9138 | 0.027824 | 0.759469292 |
| PPM1A         | ENSG00000100614  | 14 | 60702470  | 60775805  | 102  | 6  | 123834 | 1.9132 | 0.027863 | 0.759469292 |
| SETD1B        | ENSG00000139718  | 12 | 122232086 | 122280562 | 31   | 3  | 123834 | 1.9127 | 0.027893 | 0.759469292 |
| LCE1A         | ENSG00000186844  | 1  | 152789949 | 152810573 | 8    | 2  | 123834 | 1.9117 | 0.02796  | 0.759469292 |
| ST8S1A5       | ENSG00000101638  | 18 | 44249081  | 44349220  | 173  | 40 | 123834 | 1.9116 | 0.027965 | 0.759469292 |
| CLSTN1        | ENSG00000171603  | 1  | 9779084   | 9894584   | 89   | 5  | 123834 | 1.9097 | 0.028087 | 0.759469292 |
| XPO7          | ENSG00000130227  | 8  | 21767180  | 21874096  | 106  | 9  | 123834 | 1.9096 | 0.028094 | 0.759469292 |
| TSR1          | ENSG00000167721  | 17 | 2215797   | 2250801   | 15   | 7  | 123834 | 1.9087 | 0.028148 | 0.759469292 |
| ANKRD17       | ENSG00000132466  | 4  | 73929093  | 74134515  | 70   | 9  | 123834 | 1.9083 | 0.028178 | 0.759469292 |
| PPDPF         | ENSG00000125534  | 20 | 62142077  | 62163559  | 50   | 11 | 123834 | 1.9067 | 0.028281 | 0.759469292 |
| PPT2          | ENSG000000221988 | 6  | 32111218  | 32144011  | 31   | 9  | 123834 | 1.9066 | 0.028287 | 0.759469292 |
| HTST1H2BI     | ENSG00000168242  | 6  | 26263144  | 26283622  | 39   | 6  | 123834 | 1.9065 | 0.028296 | 0.759469292 |
| NEK8          | ENSG00000160602  | 17 | 27042915  | 27080473  | 25   | 4  | 123834 | 1.906  | 0.028325 | 0.759469292 |
| EVA1B         | ENSG00000142694  | 1  | 36777632  | 36799755  | 15   | 3  | 123834 | 1.9055 | 0.02836  | 0.759469292 |
| MYO5B         | ENSG00000167306  | 18 | 47339183  | 47731463  | 1029 | 44 | 123834 | 1.9053 | 0.028368 | 0.759469292 |
| CPSF4L        | ENSG00000187959  | 17 | 71234588  | 71268491  | 48   | 3  | 123834 | 1.9043 | 0.028437 | 0.759469292 |
| DNAJC6        | ENSG00000116675  | 1  | 65703902  | 65891552  | 321  | 24 | 123834 | 1.9041 | 0.028451 | 0.759469292 |
| GMPPA         | ENSG00000144591  | 2  | 220353589 | 220381710 | 24   | 3  | 123834 | 1.9041 | 0.028452 | 0.759469292 |
| GALNT18       | ENSG00000110328  | 11 | 11282423  | 11653552  | 527  | 86 | 123834 | 1.9026 | 0.028547 | 0.759469292 |
| C4orf47       | ENSG00000205129  | 4  | 186337394 | 186380980 | 97   | 12 | 123834 | 1.9023 | 0.028563 | 0.759469292 |
| STXBP5        | ENSG00000164506  | 6  | 147515561 | 147716866 | 197  | 10 | 123834 | 1.9023 | 0.028568 | 0.759469292 |
| RP11~268J15.5 | ENSG00000116883  | 1  | 36779335  | 36804822  | 14   | 3  | 123834 | 1.9007 | 0.028673 | 0.759557577 |
| CCNL2         | ENSG00000221978  | 1  | 1311091   | 1344708   | 60   | 6  | 123834 | 1.9004 | 0.02869  | 0.759557577 |
| TNFRSF25      | ENSG00000215788  | 1  | 6511211   | 6536255   | 18   | 4  | 123834 | 1.9    | 0.028716 | 0.759557577 |
| EPHB6         | ENSG00000106123  | 7  | 142542792 | 142578847 | 64   | 6  | 123834 | 1.8994 | 0.028758 | 0.759557577 |
| ZDBF2         | ENSG00000204186  | 2  | 207129387 | 207189148 | 64   | 5  | 123834 | 1.8989 | 0.028788 | 0.759557577 |
| DXO           | ENSG00000204348  | 6  | 31927587  | 31950069  | 31   | 10 | 123834 | 1.8974 | 0.028891 | 0.759557577 |
| STK19         | ENSG00000204344  | 6  | 31928868  | 31960598  | 31   | 10 | 123834 | 1.8974 | 0.028891 | 0.759557577 |
| DGKZ          | ENSG00000149091  | 11 | 46344455  | 46412104  | 34   | 5  | 123834 | 1.8973 | 0.028891 | 0.759557577 |
| SRCRB4D       | ENSG00000146700  | 7  | 76008651  | 76049012  | 112  | 11 | 123834 | 1.8923 | 0.029223 | 0.766184727 |
| DGKQ          | ENSG00000145214  | 4  | 942675    | 990683    | 61   | 10 | 123834 | 1.8918 | 0.029257 | 0.766184727 |
| COL8A2        | ENSG00000171812  | 1  | 36550837  | 36600821  | 39   | 5  | 123834 | 1.8917 | 0.029264 | 0.766184727 |
| Clorf162      | ENSG00000143110  | 1  | 112006414 | 112031134 | 29   | 9  | 123834 | 1.8904 | 0.029353 | 0.766630244 |
| CEP57L1       | ENSG00000183137  | 6  | 109406313 | 109495135 | 65   | 4  | 123834 | 1.8895 | 0.029411 | 0.766630244 |
| HCN4          | ENSG00000138622  | 15 | 73602200  | 73671605  | 94   | 11 | 123834 | 1.8888 | 0.029458 | 0.766630244 |
| SLC22A12      | ENSG00000197891  | 11 | 64348113  | 64379820  | 48   | 4  | 123834 | 1.8882 | 0.0295   | 0.766630244 |
| LSM2          | ENSG00000204392  | 6  | 31755173  | 31784761  | 47   | 16 | 123834 | 1.8877 | 0.029532 | 0.766630244 |
| APPL1         | ENSG00000157500  | 3  | 57251765  | 57317496  | 73   | 8  | 123834 | 1.8872 | 0.029565 | 0.766630244 |
| HTR5A         | ENSG00000157219  | 7  | 154852034 | 154887459 | 66   | 7  | 123834 | 1.886  | 0.029648 | 0.766630244 |
| ANXA9         | ENSG00000143412  | 1  | 150944493 | 150978110 | 48   | 8  | 123834 | 1.8851 | 0.029707 | 0.766630244 |
| SEC16A        | ENSG00000148396  | 9  | 139324549 | 139382141 | 83   | 7  | 123834 | 1.8851 | 0.02971  | 0.766630244 |
| PRKD3         | ENSG00000115825  | 2  | 37467645  | 37561951  | 268  | 14 | 123834 | 1.885  | 0.029717 | 0.766630244 |
| ABCG5         | ENSG00000138075  | 2  | 44029611  | 44076004  | 100  | 13 | 123834 | 1.8848 | 0.02973  | 0.766630244 |
| ABCE1         | ENSG00000164163  | 4  | 146009084 | 146060331 | 24   | 5  | 123834 | 1.8843 | 0.029765 | 0.766630244 |
| CLIC1         | ENSG00000213719  | 6  | 31688358  | 31717540  | 28   | 11 | 123834 | 1.8831 | 0.029844 | 0.766844368 |
| SIK1          | ENSG00000142178  | 21 | 44824395  | 44857008  | 43   | 6  | 123834 | 1.8829 | 0.029854 | 0.766844368 |
| COX14         | ENSG00000178449  | 12 | 50495762  | 50524240  | 39   | 3  | 123834 | 1.8817 | 0.029938 | 0.767028706 |
| OSGIN1        | ENSG00000140961  | 16 | 83971887  | 84009937  | 77   | 12 | 123834 | 1.8802 | 0.030038 | 0.767028706 |
| HST1H3G       | ENSG00000256018  | 6  | 26261146  | 26281612  | 41   | 7  | 123834 | 1.88   | 0.030056 | 0.767028706 |
| ZKSCAN5       | ENSG00000196652  | 7  | 99092274  | 99142323  | 42   | 7  | 123834 | 1.8797 | 0.030071 | 0.767028706 |
| POC1A         | ENSG00000164087  | 3  | 52099269  | 52198706  | 76   | 5  | 123834 | 1.8789 | 0.030126 | 0.767028706 |
| ALPK3         | ENSG00000136383  | 15 | 85349911  | 85426713  | 122  | 21 | 123834 | 1.8782 | 0.030174 | 0.767028706 |
| S100A4        | ENSG00000196154  | 1  | 153506089 | 153532612 | 33   | 1  | 123834 | 1.8781 | 0.030184 | 0.767028706 |
| S100A3        | ENSG00000188015  | 1  | 153509805 | 153531848 | 33   | 1  | 123834 | 1.8781 | 0.030184 | 0.767028706 |
| AL590483.1    | ENSG00000268146  | 1  | 244217632 | 244241211 | 9    | 3  | 123834 | 1.8772 | 0.030247 | 0.767243444 |
| TMEM87B       | ENSG00000153214  | 2  | 112802800 | 112886895 | 120  | 15 | 123834 | 1.8752 | 0.030381 | 0.767243444 |
| ASCL4         | ENSG00000187855  | 12 | 108158162 | 108180421 | 31   | 6  | 123834 | 1.8751 | 0.03039  | 0.767243444 |
| RECQL5        | ENSG00000108469  | 17 | 73612925  | 73673269  | 65   | 4  | 123834 | 1.875  | 0.030395 | 0.767243444 |
| FAM26D        | ENSG00000164451  | 6  | 116840174 | 116890031 | 78   | 9  | 123834 | 1.8741 | 0.030457 | 0.767243444 |
| BPIFA2        | ENSG00000131050  | 20 | 31739574  | 31779218  | 35   | 2  | 123834 | 1.8739 | 0.030474 | 0.767243444 |
| SMFD3         | ENSG00000103056  | 16 | 68382231  | 68492591  | 121  | 11 | 123834 | 1.8739 | 0.030475 | 0.767243444 |
| PRPF3         | ENSG00000117360  | 1  | 150283925 | 150335671 | 114  | 9  | 123834 | 1.8729 | 0.030542 | 0.767913143 |
| RNF182        | ENSG00000180537  | 6  | 13914677  | 13990533  | 65   | 4  | 123834 | 1.8717 | 0.030627 | 0.769033046 |
| MED9          | ENSG00000141026  | 17 | 17370300  | 17406540  | 52   | 6  | 123834 | 1.8699 | 0.030747 | 0.771027673 |
| NUDFAF3       | ENSG00000178057  | 3  | 49047892  | 49070928  | 4    | 2  | 123834 | 1.8657 | 0.031044 | 0.776694212 |
| TMPO          | ENSG00000120802  | 12 | 98899290  | 98954157  | 113  | 15 | 123834 | 1.865  | 0.031088 | 0.776694212 |
| CRADD         | ENSG00000169372  | 12 | 94061151  | 94298616  | 242  | 35 | 123834 | 1.8649 | 0.031097 | 0.776694212 |
| FKTN          | ENSG00000106692  | 9  | 108310411 | 108413399 | 141  | 16 | 123834 | 1.8637 | 0.031181 | 0.776694212 |
| KDM2A         | ENSG00000173120  | 11 | 66876740  | 67035558  | 90   | 7  | 123834 | 1.8637 | 0.031181 | 0.776694212 |
| IL17RC        | ENSG00000163702  | 3  | 9948758   | 9985314   | 34   | 5  | 123834 | 1.8626 | 0.031259 | 0.776694212 |
| RHOJ          | ENSG00000126785  | 14 | 63660832  | 63769937  | 182  | 19 | 123834 | 1.8626 | 0.031259 | 0.776694212 |
| CCL20         | ENSG00000115009  | 2  | 228668558 | 228692272 | 9    | 3  | 123834 | 1.8611 | 0.031366 | 0.776851862 |
| DALRD3        | ENSG00000178149  | 3  | 49042921  | 49069726  | 6    | 2  | 123834 | 1.8595 | 0.031478 | 0.776851862 |
| RAP2A         | ENSG00000125249  | 13 | 98076476  | 98131382  | 33   | 3  | 123834 | 1.8594 | 0.031483 | 0.776851862 |
| GYS1          | ENSG00000104812  | 19 | 49461382  | 49506567  | 32   | 5  | 123834 | 1.8588 | 0.031528 | 0.776851862 |
| SLC25A20      | ENSG00000178537  | 3  | 48884369  | 48946426  | 41   | 4  | 123834 | 1.8588 | 0.03153  | 0.776851862 |
| KCNMB1        | ENSG00000145936  | 5  | 169791675 | 169826681 | 34   | 6  | 123834 | 1.8579 | 0.03159  | 0.776851862 |
| ECHDC3        | ENSG00000134463  | 10 | 11774365  | 11816069  | 88   | 7  | 123834 | 1.8577 | 0.031604 | 0.776851862 |
| ZSCAN10       | ENSG00000130182  | 16 | 3128891   | 3159318   | 30   | 6  | 123834 | 1.8572 | 0.031639 | 0.776851862 |
| COL4A3        | ENSG00000169031  | 2  | 228019281 | 228189508 | 573  | 46 | 123834 | 1.8572 | 0.031642 | 0.776851862 |
| ICK           | ENSG00000112144  | 6  | 52856077  | 52936600  | 91   | 12 | 123834 | 1.8554 | 0.031772 | 0.776851862 |
| NRXN2         | ENSG00000110076  | 11 | 64363646  | 64500660  | 109  | 6  | 123834 | 1.8553 | 0.031775 | 0.776851862 |
| TTAF1         | ENSG00000221995  | 17 | 27390537  | 27428537  | 52   | 4  | 123834 | 1.8551 | 0.031794 | 0.776851862 |
| OR2W3         | ENSG00000238243  | 1  | 248021277 | 248070449 | 130  | 19 | 123834 | 1.8542 | 0.031855 | 0.776851862 |
| PYDC1         | ENSG00000169900  | 16 | 31217283  | 31238680  | 1    | 1  | 123834 | 1.8538 | 0.031881 | 0.776851862 |
| ATP6V1G3      | ENSG00000151418  | 1  | 198482352 | 198520075 | 71   | 9  | 123834 | 1.8532 | 0.031928 | 0.776851862 |
| ARL13B        | ENSG00000169379  | 3  | 93688983  | 93784512  | 54   | 8  | 123834 | 1.8525 | 0.031976 | 0.776851862 |
| NLE1          | ENSG00000073536  | 17 | 33445772  | 33479334  | 15   | 6  | 123834 | 1.8523 | 0.031992 | 0.776851862 |
| HOXB4         | ENSG00000182742  | 17 | 46642875  | 46667473  | 38   | 9  | 123834 | 1.8522 | 0.032001 | 0.776851    |

|              |                 |    |           |          |           |     |        |        |          |             |             |             |
|--------------|-----------------|----|-----------|----------|-----------|-----|--------|--------|----------|-------------|-------------|-------------|
| PEX11G       | ENSG00000104883 | 19 | 7531761   | 7572335  | 57        | 11  | 123834 | 1.8489 | 0.032235 | 0.777977178 |             |             |
| ASPHD1       | ENSG00000174939 | 16 | 29901696  | 29941185 | 26        | 3   | 123834 | 1.8487 | 0.032252 | 0.777977178 |             |             |
| ADAMTS12     | ENSG00000151388 | 5  | 33513640  | 33902297 | 512       | 48  | 123834 | 1.8475 | 0.032335 | 0.778100901 |             |             |
| SMIM4        | ENSG00000168273 | 3  | 52558029  | 52623253 | 123       | 8   | 123834 | 1.8475 | 0.032339 | 0.778100901 |             |             |
| SLC47A1      | ENSG00000142494 | 17 | 19388698  | 19492347 | 43        | 10  | 123834 | 1.8448 | 0.032534 | 0.778528598 |             |             |
| ELFN1        | ENSG00000225968 | 7  | 1717755   | 1797590  | 68        | 9   | 123834 | 1.8441 | 0.032584 | 0.778528598 |             |             |
| SLC35G3      | ENSG00000164729 | 17 | 33509539  | 33531412 | 32        | 5   | 123834 | 1.8431 | 0.032661 | 0.778528598 |             |             |
| BTRC         | ENSG00000166167 | 10 | 103103820 |          | 103327078 |     | 365    | 10     | 123834   | 1.8424      | 0.032705    | 0.778528598 |
| SAP30BP      | ENSG00000161526 | 17 | 73653196  | 73714142 | 50        | 5   | 123834 | 1.8424 | 0.032706 | 0.778528598 |             |             |
| FOX P1       | ENSG00000114861 | 3  | 70993844  | 71643140 | 528       | 69  | 123834 | 1.8409 | 0.03282  | 0.778528598 |             |             |
| AC073657.1   | ENSG00000268632 | 15 |           | 42063346 | 42086229  | 28  | 7      | 123834 | 1.8408   | 0.032823    | 0.778528598 |             |
| HPS4         | ENSG00000100099 | 22 | 26829389  | 26889803 | 112       | 11  | 123834 | 1.8401 | 0.032877 | 0.778528598 |             |             |
| PTPRZ1       | ENSG00000106278 | 7  | 121503143 |          | 121712090 |     | 246    | 30     | 123834   | 1.8389      | 0.032966    | 0.778528598 |
| CELSR3       | ENSG00000008300 | 3  | 48663902  | 48710348 | 32        | 2   | 123834 | 1.8381 | 0.033027 | 0.778528598 |             |             |
| TNN          | ENSG00000120332 | 1  | 175026994 |          | 175127202 |     | 258    | 21     | 123834   | 1.8367      | 0.033129    | 0.778528598 |
| SPDYE1       | ENSG00000136206 | 7  | 44030488  | 44059721 | 13        | 2   | 123834 | 1.8365 | 0.033145 | 0.778528598 |             |             |
| SYCP1        | ENSG00000198765 | 1  | 115387424 |          | 115547991 |     | 313    | 15     | 123834   | 1.8361      | 0.033175    | 0.778528598 |
| PCDHGC5      | ENSG00000240764 | 5  | 140858808 |          | 140902546 |     | 61     | 14     | 123834   | 1.835       | 0.033254    | 0.778528598 |
| PRKCQ        | ENSG00000065675 | 10 | 6459105   | 6632263  | 266       | 34  | 123834 | 1.8349 | 0.033261 | 0.778528598 |             |             |
| ACVR2A       | ENSG00000121989 | 2  | 148592086 |          | 148698393 |     | 92     | 8      | 123834   | 1.8348      | 0.033265    | 0.778528598 |
| ARHGAP26     | ENSG00000145819 | 5  | 142139949 |          | 142618576 |     | 665    | 56     | 123834   | 1.8343      | 0.033302    | 0.778528598 |
| GPR153       | ENSG00000158292 | 1  | 6297406   | 6331035  | 24        | 4   | 123834 | 1.834  | 0.033326 | 0.778528598 |             |             |
| CABLES1      | ENSG00000134508 | 18 | 20704528  | 20850431 | 111       | 13  | 123834 | 1.834  | 0.033326 | 0.778528598 |             |             |
| UPF3A        | ENSG00000169062 | 13 | 115037059 |          | 115081283 |     | 63     | 8      | 123834   | 1.8339      | 0.033336    | 0.778528598 |
| ADCY6        | ENSG00000174233 | 12 | 49149975  | 49192820 | 39        | 3   | 123834 | 1.833  | 0.033401 | 0.778528598 |             |             |
| DEGS2        | ENSG00000168350 | 14 | 100602756 |          | 100636500 |     | 47     | 8      | 123834   | 1.8319      | 0.033482    | 0.778528598 |
| OTOG         | ENSG00000188162 | 11 | 17558920  | 17678697 | 152       | 17  | 123834 | 1.8318 | 0.033487 | 0.778528598 |             |             |
| ZP3          | ENSG00000188372 | 7  | 76016835  | 76081388 | 144       | 14  | 123834 | 1.8308 | 0.033566 | 0.778528598 |             |             |
| PSG11        | ENSG00000243130 | 19 | 43501808  | 43540664 | 82        | 4   | 123834 | 1.8304 | 0.033594 | 0.778528598 |             |             |
| RYR1         | ENSG00000196218 | 19 | 38914339  | 39088204 | 392       | 32  | 123834 | 1.8297 | 0.033647 | 0.778528598 |             |             |
| ATP5G1       | ENSG00000159199 | 17 | 46960127  | 46983233 | 49        | 5   | 123834 | 1.8291 | 0.033696 | 0.778528598 |             |             |
| VPS33B       | ENSG00000184056 | 15 | 91531646  | 91575833 | 82        | 11  | 123834 | 1.8284 | 0.033748 | 0.778528598 |             |             |
| SSR2         | ENSG00000163479 | 1  | 155968839 |          | 156000750 |     | 12     | 3      | 123834   | 1.828       | 0.033777    | 0.778528598 |
| ZNF362       | ENSG00000160094 | 1  | 33712146  | 33776320 | 50        | 10  | 123834 | 1.8272 | 0.033833 | 0.778528598 |             |             |
| E2F3         | ENSG00000112242 | 6  | 20392398  | 20503941 | 87        | 14  | 123834 | 1.8272 | 0.033837 | 0.778528598 |             |             |
| RARB         | ENSG00000077092 | 3  | 25205823  | 25649423 | 867       | 57  | 123834 | 1.8268 | 0.033862 | 0.778528598 |             |             |
| MTUS1        | ENSG00000129422 | 8  | 17491304  | 17668426 | 530       | 46  | 123834 | 1.8267 | 0.033876 | 0.778528598 |             |             |
| TRAPPC3L     | ENSG00000173626 | 6  | 116806152 |          | 116876773 |     | 104    | 14     | 123834   | 1.8234      | 0.034123    | 0.778528598 |
| PIGH         | ENSG00000100564 | 14 | 68038672  | 68077004 | 62        | 11  | 123834 | 1.8224 | 0.034195 | 0.778528598 |             |             |
| MGST1        | ENSG00000008394 | 12 | 16490076  | 16772193 | 227       | 25  | 123834 | 1.8224 | 0.0342   | 0.778528598 |             |             |
| C10orf71     | ENSG00000177354 | 10 | 50497187  | 50545537 | 93        | 15  | 123834 | 1.8222 | 0.03421  | 0.778528598 |             |             |
| HCRTR1       | ENSG00000121764 | 1  | 32073287  | 32108119 | 43        | 4   | 123834 | 1.8212 | 0.034286 | 0.778528598 |             |             |
| ASB2         | ENSG00000100628 | 14 | 94390499  | 94453137 | 116       | 19  | 123834 | 1.8208 | 0.034317 | 0.778528598 |             |             |
| PARL         | ENSG00000175193 | 3  | 183537173 |          | 183612721 |     | 161    | 13     | 123834   | 1.8208      | 0.03432     | 0.778528598 |
| MRPS18C      | ENSG00000163319 | 4  | 84367085  | 84400888 | 49        | 4   | 123834 | 1.8201 | 0.03437  | 0.778528598 |             |             |
| OR11G2       | ENSG00000196832 | 14 | 20655495  | 20676605 | 54        | 12  | 123834 | 1.8201 | 0.034371 | 0.778528598 |             |             |
| RRP12        | ENSG00000052749 | 10 | 99106115  | 99171127 | 177       | 7   | 123834 | 1.8201 | 0.034372 | 0.778528598 |             |             |
| BDKRB1       | ENSG00000100739 | 14 | 96712161  | 96745304 | 54        | 13  | 123834 | 1.8196 | 0.034407 | 0.778528598 |             |             |
| SOCS7        | ENSG00000174111 | 17 | 36498111  | 36566019 | 81        | 6   | 123834 | 1.8196 | 0.034413 | 0.778528598 |             |             |
| RSRC2        | ENSG00000111011 | 12 | 122979190 |          | 123021547 |     | 45     | 5      | 123834   | 1.8192      | 0.034441    | 0.778528598 |
| SERPINE3     | ENSG00000253309 | 13 | 51899909  | 51948871 | 81        | 5   | 123834 | 1.8186 | 0.034487 | 0.778528598 |             |             |
| CCDC102A     | ENSG00000135736 | 16 | 57536090  | 57580511 | 96        | 14  | 123834 | 1.818  | 0.034529 | 0.778528598 |             |             |
| OLFM1        | ENSG00000130558 | 9  | 137957268 |          | 138023025 |     | 137    | 21     | 123834   | 1.8177      | 0.034556    | 0.778528598 |
| SLFN5        | ENSG00000166750 | 17 | 33560055  | 33610674 | 123       | 14  | 123834 | 1.8177 | 0.034559 | 0.778528598 |             |             |
| SERPINA12    | ENSG00000165953 | 14 |           | 94943611 | 94994181  | 112 | 25     | 123834 | 1.8172   | 0.03459     | 0.778528598 |             |
| OR2V2        | ENSG00000182613 | 5  | 180571943 |          | 180592890 |     | 70     | 9      | 123834   | 1.8151      | 0.034755    | 0.778528598 |
| SPRED2       | ENSG00000198369 | 2  | 65527985  | 65669771 | 220       | 20  | 123834 | 1.8149 | 0.034771 | 0.778528598 |             |             |
| RASD1        | ENSG00000108551 | 17 | 17387751  | 17409709 | 29        | 4   | 123834 | 1.8141 | 0.034834 | 0.778528598 |             |             |
| OBP2B        | ENSG00000171102 | 9  | 136070664 |          | 136094630 |     | 53     | 5      | 123834   | 1.814       | 0.034842    | 0.778528598 |
| TPRX1        | ENSG00000178928 | 19 | 48294500  | 48332308 | 53        | 9   | 123834 | 1.8138 | 0.034853 | 0.778528598 |             |             |
| ZNF536       | ENSG00000198597 | 19 | 30709197  | 31214445 | 494       | 57  | 123834 | 1.8137 | 0.034863 | 0.778528598 |             |             |
| COL19A1      | ENSG00000082293 | 6  | 70566463  | 70929679 | 513       | 38  | 123834 | 1.8134 | 0.034881 | 0.778528598 |             |             |
| FLJ27365     | ENSG00000197182 | 22 | 46439749  | 46519808 | 35        | 10  | 123834 | 1.8131 | 0.034906 | 0.778528598 |             |             |
| PTRH2        | ENSG00000141378 | 17 | 57741997  | 57794987 | 45        | 6   | 123834 | 1.8129 | 0.034926 | 0.778528598 |             |             |
| SLC6A16      | ENSG00000063127 | 19 | 49782895  | 49838482 | 16        | 3   | 123834 | 1.8125 | 0.034953 | 0.778528598 |             |             |
| LYSMD1       | ENSG00000163155 | 1  | 151122224 |          | 151148424 |     | 8      | 4      | 123834   | 1.8123      | 0.034973    | 0.778528598 |
| STRA8        | ENSG00000146857 | 7  | 134906731 |          | 134953244 |     | 35     | 7      | 123834   | 1.812       | 0.034995    | 0.778528598 |
| RCVRN        | ENSG00000109047 | 17 | 9789637   | 9818938  | 48        | 8   | 123834 | 1.8119 | 0.034998 | 0.778528598 |             |             |
| FADS2        | ENSG00000134824 | 11 | 61550452  | 61644826 | 128       | 15  | 123834 | 1.8113 | 0.035045 | 0.778528598 |             |             |
| SMIM5        | ENSG00000204323 | 17 | 73619514  | 73647484 | 15        | 2   | 123834 | 1.8111 | 0.03506  | 0.778528598 |             |             |
| MEOX2        | ENSG00000106511 | 7  | 15640837  | 15736437 | 194       | 16  | 123834 | 1.8101 | 0.035138 | 0.778929231 |             |             |
| YWHAH        | ENSG00000128245 | 22 | 32330447  | 32363590 | 68        | 12  | 123834 | 1.8098 | 0.03516  | 0.778929231 |             |             |
| HSPA12A      | ENSG00000165868 | 10 | 118420703 |          | 118512085 |     | 174    | 16     | 123834   | 1.8078      | 0.035319    | 0.781042016 |
| ADCY5        | ENSG00000173175 | 3  | 122991143 |          | 123178605 |     | 184    | 14     | 123834   | 1.8069      | 0.035387    | 0.781042016 |
| CRYZ         | ENSG00000116791 | 1  | 75161170  | 75209092 | 100       | 15  | 123834 | 1.8064 | 0.035425 | 0.781042016 |             |             |
| C2orf50      | ENSG00000150873 | 2  | 11263179  | 11296916 | 93        | 10  | 123834 | 1.8055 | 0.035498 | 0.781042016 |             |             |
| CDS2         | ENSG00000101290 | 20 | 5097432   | 5188533  | 164       | 16  | 123834 | 1.8052 | 0.035519 | 0.781042016 |             |             |
| RP11-529K1.3 | ENSG00000260537 | 16 |           | 70323097 | 70410163  | 37  | 8      | 123834 | 1.8051   | 0.03553     | 0.781042016 |             |
| OR6F1        | ENSG00000169214 | 1  | 247865045 |          | 247886105 |     | 45     | 7      | 123834   | 1.8049      | 0.035543    | 0.781042016 |
| FAM181A      | ENSG00000140067 | 14 | 94375240  | 94405954 | 42        | 9   | 123834 | 1.8035 | 0.035654 | 0.781202642 |             |             |
| AP001094.1   | ENSG00000268046 | 18 |           | 8326437  | 8347038   | 36  | 4      | 123834 | 1.8031   | 0.03569     | 0.781202642 |             |
| AC074389.6   | ENSG00000205971 | 7  |           | 1722446  | 1743961   | 27  | 2      | 123834 | 1.8024   | 0.035742    | 0.781202642 |             |
| SLC44A4      | ENSG00000204385 | 6  | 31820969  | 31856823 | 50        | 13  | 123834 | 1.8017 | 0.035798 | 0.781202642 |             |             |
| POLR2F       | ENSG00000100142 | 22 | 3838614   | 38447922 | 64        | 4   | 123834 | 1.8017 | 0.035798 | 0.781202642 |             |             |
| AFP          | ENSG00000081051 | 4  | 74286855  | 74331891 | 60        | 6   | 123834 | 1.8016 | 0.035806 | 0.781202642 |             |             |
| USH2A        | ENSG00000042781 | 1  | 215786236 |          | 216606738 |     | 1264   | 95     | 123834   | 1.8012      | 0.035838    | 0.781202642 |
| PRRT1        | ENSG00000204314 | 6  | 32106136  | 32132150 | 33        | 11  | 123834 | 1.7994 | 0.035979 | 0.782506812 |             |             |
| SKIV2L       | ENSG00000204351 | 6  | 31916857  | 31947532 | 37        | 11  | 123834 | 1.7991 | 0.036001 | 0.782506812 |             |             |
| PRNP         | ENSG00000171867 | 20 | 4656882   | 4692236  | 51        | 10  | 123834 | 1.7979 | 0.036094 | 0.782506812 |             |             |
| ADIG         | ENSG00000182035 | 20 | 37199838  | 37227106 | 39        | 8   | 123834 | 1.7976 | 0.036121 | 0.782506812 |             |             |
| ZNF773       | ENSG00000152439 | 19 | 58001283  | 58039772 | 180       | 5   | 123834 | 1.7971 | 0.036159 | 0.782506812 |             |             |
| VWA2         | ENSG00000165816 | 10 | 115989018 |          | 116061272 |     | 127    | 13     | 123834   | 1.7969      | 0.036174    | 0.782506812 |
| S100A5       | ENSG00000196420 | 1  | 153499623 |          | 153524241 |     | 30     | 2      | 123834   | 1.7968      | 0.036186    | 0.782506812 |
| GADD45G      | ENSG00000130222 | 9  | 92209928  | 92231470 | 11        | 4   | 123834 | 1.796  | 0.036245 | 0           |             |             |

|            |                  |    |           |           |      |     |        |        |          |             |
|------------|------------------|----|-----------|-----------|------|-----|--------|--------|----------|-------------|
| GPATCH2    | ENSG00000092978  | 1  | 217590334 | 217814424 | 268  | 27  | 123834 | 1.7923 | 0.036541 | 0.783940551 |
| C15orf39   | ENSG00000167173  | 15 | 75477984  | 75514510  | 14   | 3   | 123834 | 1.7918 | 0.036584 | 0.78397821  |
| MAPK8IP1   | ENSG00000121653  | 11 | 45897202  | 45938016  | 20   | 7   | 123834 | 1.7896 | 0.036759 | 0.785358565 |
| RASAL3     | ENSG00000105122  | 19 | 15552435  | 15585382  | 20   | 4   | 123834 | 1.7894 | 0.036778 | 0.785358565 |
| C8orf17    | ENSG00000250733  | 8  | 140933416 | 140956190 | 28   | 4   | 123834 | 1.7889 | 0.036812 | 0.785358565 |
| RCCD1      | ENSG00000166965  | 15 | 91488100  | 91516349  | 48   | 9   | 123834 | 1.7888 | 0.036821 | 0.785358565 |
| IDUA       | ENSG00000127415  | 4  | 970785    | 1008316   | 42   | 11  | 123834 | 1.7884 | 0.036855 | 0.785358565 |
| DIDO1      | ENSG00000101191  | 20 | 61499090  | 61579304  | 159  | 20  | 123834 | 1.7878 | 0.036904 | 0.785522096 |
| LCTL       | ENSG00000188501  | 15 | 66829517  | 66868317  | 78   | 12  | 123834 | 1.7867 | 0.03699  | 0.785536856 |
| CAPN15     | ENSG00000103326  | 16 | 567717    | 614636    | 44   | 7   | 123834 | 1.7864 | 0.037017 | 0.785536856 |
| ANAPC10    | ENSG00000164162  | 4  | 145878264 | 146029693 | 97   | 10  | 123834 | 1.786  | 0.037046 | 0.785536856 |
| SMIM20     | ENSG00000250317  | 4  | 25853452  | 25941435  | 103  | 13  | 123834 | 1.7857 | 0.03707  | 0.785536856 |
| RPL11      | ENSG00000142676  | 1  | 24008269  | 24032915  | 2    | 1   | 123834 | 1.7838 | 0.037228 | 0.787109659 |
| TCEB3C     | ENSG00000183791  | 18 | 44544573  | 44566449  | 15   | 3   | 123834 | 1.7817 | 0.037396 | 0.787109659 |
| PCDHGC4    | ENSG00000242419  | 5  | 140854741 | 140902546 | 66   | 15  | 123834 | 1.7816 | 0.037408 | 0.787109659 |
| ABCC2      | ENSG00000023839  | 10 | 101532489 | 101621949 | 161  | 13  | 123834 | 1.7814 | 0.037421 | 0.787109659 |
| SFXN5      | ENSG00000144040  | 2  | 73159165  | 73312747  | 150  | 8   | 123834 | 1.7813 | 0.037428 | 0.787109659 |
| KRTAP13-1  | ENSG00000198390  | 21 | 31758392  | 31779136  | 14   | 3   | 123834 | 1.781  | 0.037459 | 0.787109659 |
| MCL1       | ENSG00000258839  | 16 | 89968527  | 89997385  | 68   | 9   | 123834 | 1.7801 | 0.037528 | 0.787109659 |
| HYAL3      | ENSG00000186792  | 3  | 50320262  | 50346899  | 12   | 3   | 123834 | 1.7799 | 0.037545 | 0.787109659 |
| PGAM1      | ENSG00000171314  | 10 | 99175917  | 99203198  | 39   | 8   | 123834 | 1.779  | 0.037618 | 0.787109659 |
| ITIH1      | ENSG00000055957  | 3  | 52801603  | 52836078  | 43   | 4   | 123834 | 1.7788 | 0.037637 | 0.787109659 |
| SEC11A     | ENSG00000140612  | 15 | 85202775  | 85269947  | 94   | 13  | 123834 | 1.7778 | 0.037714 | 0.787109659 |
| GNG12      | ENSG00000172380  | 1  | 68157149  | 68309150  | 199  | 24  | 123834 | 1.7775 | 0.037742 | 0.787109659 |
| AKNA       | ENSG00000106948  | 9  | 117086436 | 117166685 | 72   | 9   | 123834 | 1.7775 | 0.037745 | 0.787109659 |
| OR5AC2     | ENSG00000196578  | 3  | 97796017  | 97816946  | 53   | 4   | 123834 | 1.777  | 0.037787 | 0.787109659 |
| GALK1      | ENSG00000108479  | 17 | 73737675  | 73771792  | 16   | 6   | 123834 | 1.7769 | 0.037791 | 0.787109659 |
| UBXN7      | ENSG00000163960  | 3  | 196064533 | 196169345 | 90   | 10  | 123834 | 1.7756 | 0.037897 | 0.787109659 |
| PKIG       | ENSG00000168734  | 20 | 43150426  | 43262888  | 143  | 12  | 123834 | 1.7756 | 0.037897 | 0.787109659 |
| PEF1       | ENSG00000162517  | 1  | 32085463  | 32120497  | 36   | 4   | 123834 | 1.7753 | 0.037927 | 0.787109659 |
| PCBP1      | ENSG00000169564  | 2  | 70304585  | 70326332  | 30   | 2   | 123834 | 1.7752 | 0.037931 | 0.787109659 |
| TMEM254    | ENSG00000133678  | 10 | 81828402  | 81862313  | 117  | 15  | 123834 | 1.7747 | 0.037977 | 0.787204816 |
| AL135998.1 | ENSG00000215306  | 14 | 23276463  | 23301750  | 40   | 8   | 123834 | 1.7736 | 0.038068 | 0.787684074 |
| NP1PB8     | ENSG00000255524  | 16 | 28638975  | 28680003  | 7    | 1   | 123834 | 1.7734 | 0.038083 | 0.787684074 |
| NTM        | ENSG00000182667  | 11 | 131230373 | 132216716 | 1169 | 134 | 123834 | 1.7722 | 0.038184 | 0.788127622 |
| TCEB3B     | ENSG00000206181  | 18 | 44548943  | 44571988  | 22   | 4   | 123834 | 1.772  | 0.038194 | 0.788127622 |
| FTL        | ENSG000000087086 | 19 | 49458558  | 49480135  | 19   | 4   | 123834 | 1.7713 | 0.038255 | 0.788127622 |
| CCDC154    | ENSG00000197599  | 16 | 1474384   | 1504557   | 78   | 10  | 123834 | 1.7708 | 0.038297 | 0.788127622 |
| GK2        | ENSG00000196475  | 4  | 80317508  | 80339372  | 10   | 3   | 123834 | 1.77   | 0.038363 | 0.788127622 |
| CHIC2      | ENSG00000109220  | 4  | 54865956  | 54940857  | 48   | 2   | 123834 | 1.7694 | 0.038411 | 0.788127622 |
| EXOSC6     | ENSG00000223496  | 16 | 70274134  | 70295833  | 6    | 4   | 123834 | 1.769  | 0.038446 | 0.788127622 |
| FTGN       | ENSG00000182263  | 2  | 164439906 | 164602522 | 146  | 20  | 123834 | 1.7684 | 0.038494 | 0.788127622 |
| HES3       | ENSG00000173673  | 1  | 6294252   | 6315638   | 11   | 3   | 123834 | 1.7679 | 0.038535 | 0.788127622 |
| SCAF11     | ENSG00000139218  | 12 | 46302914  | 46395903  | 48   | 5   | 123834 | 1.7678 | 0.03855  | 0.788127622 |
| WDR66      | ENSG00000158023  | 12 | 122345768 | 122451833 | 225  | 19  | 123834 | 1.7673 | 0.03859  | 0.788127622 |
| LAMB3      | ENSG00000196878  | 1  | 209778215 | 209835811 | 102  | 14  | 123834 | 1.7671 | 0.038602 | 0.788127622 |
| AC011239.1 | ENSG00000224361  | 2  | 23719913  | 23757214  | 61   | 10  | 123834 | 1.7666 | 0.038645 | 0.78815897  |
| CREB3L1    | ENSG00000157613  | 11 | 46289212  | 46352972  | 14   | 4   | 123834 | 1.7657 | 0.03872  | 0.788386183 |
| ADAMTS6    | ENSG00000049192  | 5  | 64434563  | 64787747  | 514  | 29  | 123834 | 1.7648 | 0.0388   | 0.788386183 |
| KNH2       | ENSG00000055118  | 7  | 150632049 | 150685403 | 42   | 8   | 123834 | 1.7644 | 0.038829 | 0.788386183 |
| LGALS16    | ENSG00000249861  | 19 | 40136534  | 40161287  | 24   | 3   | 123834 | 1.764  | 0.038865 | 0.788386183 |
| PRRG2      | ENSG00000126460  | 19 | 50073903  | 50104272  | 46   | 4   | 123834 | 1.7636 | 0.038897 | 0.788386183 |
| HSPA1L     | ENSG00000204390  | 6  | 31767396  | 31793437  | 36   | 13  | 123834 | 1.7635 | 0.038905 | 0.788386183 |
| CDKL4      | ENSG00000205111  | 2  | 39392787  | 39466729  | 120  | 7   | 123834 | 1.763  | 0.038947 | 0.78839678  |
| MARCKS     | ENSG00000155130  | 6  | 114168541 | 114194648 | 19   | 6   | 123834 | 1.7616 | 0.03907  | 0.790045277 |
| AL355531.2 | ENSG00000268421  | 10 | 131298884 | 131319525 | 124  | 8   | 123834 | 1.7601 | 0.039194 | 0.790454634 |
| USHBP1     | ENSG00000130307  | 19 | 17349985  | 17403595  | 120  | 15  | 123834 | 1.7599 | 0.039212 | 0.790454634 |
| ECI2       | ENSG00000198721  | 6  | 4105923   | 4145831   | 87   | 8   | 123834 | 1.7599 | 0.039215 | 0.790454634 |
| ZNHIT1     | ENSG00000106400  | 7  | 100850949 | 100877471 | 37   | 6   | 123834 | 1.759  | 0.03929  | 0.791114971 |
| VPS72      | ENSG00000163159  | 1  | 151132463 | 151177797 | 20   | 5   | 123834 | 1.7585 | 0.039331 | 0.791114971 |
| TUBA4A     | ENSG00000127824  | 2  | 220104433 | 220152892 | 48   | 6   | 123834 | 1.7575 | 0.039417 | 0.791672161 |
| MMS19      | ENSG00000155229  | 10 | 99208081  | 99268551  | 52   | 7   | 123834 | 1.7572 | 0.039442 | 0.791672161 |
| SMCP       | ENSG00000163206  | 1  | 152840793 | 152867523 | 14   | 4   | 123834 | 1.7566 | 0.039494 | 0.791879696 |
| CD84       | ENSG00000066294  | 1  | 160500885 | 160559306 | 181  | 16  | 123834 | 1.7557 | 0.039574 | 0.792479697 |
| SLC22A8    | ENSG00000149452  | 11 | 62746626  | 62793311  | 42   | 11  | 123834 | 1.7551 | 0.039618 | 0.792479697 |
| ARHGD1B    | ENSG00000111348  | 12 | 15084951  | 15124662  | 23   | 5   | 123834 | 1.7548 | 0.039649 | 0.792479697 |
| PIP5K1A    | ENSG00000143398  | 1  | 151160425 | 151232012 | 53   | 5   | 123834 | 1.7535 | 0.039761 | 0.793402176 |
| SNF8       | ENSG00000159210  | 17 | 46996678  | 47032479  | 102  | 7   | 123834 | 1.7524 | 0.039854 | 0.793402176 |
| SMG5       | ENSG00000198952  | 1  | 156209015 | 156262620 | 55   | 4   | 123834 | 1.7515 | 0.039927 | 0.793402176 |
| LTBP2      | ENSG00000119681  | 14 | 74954873  | 75089306  | 148  | 21  | 123834 | 1.7514 | 0.039943 | 0.793402176 |
| CACNA1C    | ENSG00000151067  | 12 | 2069952   | 2812108   | 1066 | 100 | 123834 | 1.7512 | 0.039953 | 0.793402176 |
| TMEM115    | ENSG00000126062  | 3  | 50382180  | 50407041  | 5    | 1   | 123834 | 1.751  | 0.039976 | 0.793402176 |
| C17orf80   | ENSG00000141219  | 17 | 71218372  | 71255091  | 92   | 3   | 123834 | 1.7505 | 0.040019 | 0.793402176 |
| HESX1      | ENSG00000163666  | 3  | 57221944  | 57270549  | 42   | 5   | 123834 | 1.7495 | 0.040105 | 0.793402176 |
| FAM153C    | ENSG00000204677  | 5  | 177423406 | 177492560 | 33   | 6   | 123834 | 1.7486 | 0.040176 | 0.793402176 |
| UNC119     | ENSG00000109103  | 17 | 26863725  | 26889686  | 3    | 2   | 123834 | 1.7486 | 0.040176 | 0.793402176 |
| ACTRT3     | ENSG00000184378  | 3  | 169474709 | 169497683 | 17   | 2   | 123834 | 1.7486 | 0.040184 | 0.793402176 |
| RAB35      | ENSG00000111737  | 12 | 120522899 | 120565306 | 44   | 7   | 123834 | 1.7478 | 0.040248 | 0.793402176 |
| M6PR       | ENSG00000003056  | 12 | 9082959   | 9112551   | 56   | 5   | 123834 | 1.7478 | 0.040253 | 0.793402176 |
| TMEM81     | ENSG00000174529  | 1  | 205042258 | 205063645 | 52   | 8   | 123834 | 1.7473 | 0.040292 | 0.793402176 |
| SOCS6      | ENSG00000170677  | 18 | 67946137  | 68007436  | 128  | 17  | 123834 | 1.7468 | 0.040338 | 0.793402176 |
| ASPHD2     | ENSG00000128203  | 22 | 26815239  | 26850981  | 55   | 9   | 123834 | 1.7465 | 0.040363 | 0.793402176 |
| ITGA9      | ENSG00000144668  | 3  | 37483606  | 37875005  | 552  | 51  | 123834 | 1.745  | 0.040493 | 0.794503271 |
| MBLAC2     | ENSG00000176055  | 5  | 89744020  | 89780585  | 32   | 4   | 123834 | 1.7442 | 0.040566 | 0.794503271 |
| EPG5       | ENSG00000152223  | 18 | 43417574  | 43557240  | 233  | 18  | 123834 | 1.7432 | 0.040649 | 0.794503271 |
| ABCD4      | ENSG00000119688  | 14 | 74742126  | 74779759  | 40   | 4   | 123834 | 1.743  | 0.040668 | 0.794503271 |
| GRB2       | ENSG00000177885  | 17 | 73304157  | 73411790  | 217  | 10  | 123834 | 1.7427 | 0.040694 | 0.794503271 |
| UBXN6      | ENSG00000167671  | 19 | 4434996   | 4467819   | 54   | 6   | 123834 | 1.7424 | 0.040719 | 0.794503271 |
| CLUL1      | ENSG00000079101  | 18 | 586988    | 660334    | 41   | 11  | 123834 | 1.7422 | 0.040736 | 0.794503271 |
| MOC51      | ENSG00000124615  | 6  | 39857354  | 39912290  | 85   | 11  | 123834 | 1.7417 | 0.040778 | 0.794503271 |
| REPS1      | ENSG00000135597  | 6  | 139214630 | 139319398 | 278  | 11  | 123834 | 1.7415 | 0.040796 | 0.794503271 |
| NAT6       | ENSG00000243477  | 3  | 50323833  | 50346852  | 11   | 3   | 123834 | 1.7411 | 0.040837 | 0.794503271 |
| MAN2A2     | ENSG00000196547  | 15 | 91435448  | 91475814  | 53   | 8   | 123834 | 1.7405 | 0.040888 | 0.79468211  |
| WNT4       | ENSG00000162552  | 1  | 22433798  | 22480462  | 85   | 13  | 123834 | 1.7397 | 0.040958 | 0.794844735 |
| NOB1       | ENSG00000141101  | 16 | 69765770  | 69798843  | 41   | 7   | 123834 | 1.7394 | 0.04098  | 0.794844735 |
| SHD        | ENSG00000105251  | 19 | 4268598   | 4300721   | 21   | 5   | 123834 | 1.7388 | 0.041039 | 0.795177688 |
| EXOSC      |                  |    |           |           |      |     |        |        |          |             |



|              |                  |    |           |           |      |     |        |        |          |             |             |             |
|--------------|------------------|----|-----------|-----------|------|-----|--------|--------|----------|-------------|-------------|-------------|
| DCDC2        | ENSG00000146038  | 6  | 24161984  | 24368280  | 583  | 38  | 123834 | 1.6812 | 0.046358 | 0.80729088  |             |             |
| CREB5        | ENSG00000146592  | 7  | 28328940  | 28875511  | 648  | 102 | 123834 | 1.681  | 0.046378 | 0.80729088  |             |             |
| CCDC110      | ENSG00000168491  | 4  | 186356336 | 186402913 |      |     | 104    | 16     | 123834   | 1.6809      | 0.046393    | 0.80729088  |
| PRKACB       | ENSG00000142875  | 1  | 84533745  | 84714181  | 156  | 12  | 123834 | 1.6806 | 0.046422 | 0.80729088  |             |             |
| SLC24A3      | ENSG00000185052  | 20 | 19183290  | 19713581  | 918  | 69  | 123834 | 1.6803 | 0.046449 | 0.80729088  |             |             |
| RDX          | ENSG00000137710  | 11 | 110035605 | 110177447 |      |     | 119    | 6      | 123834   | 1.68        | 0.046474    | 0.80729088  |
| LSMD1        | ENSG00000183011  | 17 | 7750003   | 7798556   | 57   | 10  | 123834 | 1.679  | 0.046581 | 0.80729088  |             |             |
| CILP         | ENSG00000138615  | 15 | 65478337  | 65513826  | 11   | 1   | 123834 | 1.6789 | 0.046584 | 0.80729088  |             |             |
| EBPL         | ENSG00000123179  | 13 | 50224859  | 50275611  | 148  | 18  | 123834 | 1.6772 | 0.046752 | 0.80729088  |             |             |
| TMX1         | ENSG00000139921  | 14 | 51696880  | 51732759  | 70   | 9   | 123834 | 1.6771 | 0.046765 | 0.80729088  |             |             |
| OASL         | ENSG00000135114  | 12 | 121448095 | 121487045 |      |     | 87     | 16     | 123834   | 1.6764      | 0.046825    | 0.80729088  |
| ARIH2        | ENSG00000177479  | 3  | 48946254  | 49033815  | 65   | 6   | 123834 | 1.6764 | 0.046832 | 0.80729088  |             |             |
| RSPH1        | ENSG00000160188  | 21 | 43882596  | 43926464  | 69   | 14  | 123834 | 1.676  | 0.046867 | 0.80729088  |             |             |
| PPM1B        | ENSG00000138032  | 2  | 44385108  | 44481523  | 105  | 8   | 123834 | 1.676  | 0.04687  | 0.80729088  |             |             |
| ISYNA1       | ENSG00000105655  | 19 | 18535198  | 18559111  | 21   | 2   | 123834 | 1.675  | 0.046971 | 0.80729088  |             |             |
| JAK1         | ENSG00000162434  | 1  | 65288912  | 65442187  | 268  | 21  | 123834 | 1.6749 | 0.046976 | 0.80729088  |             |             |
| LMBR1L       | ENSG00000139636  | 12 | 49480919  | 49514683  | 25   | 3   | 123834 | 1.6749 | 0.046976 | 0.80729088  |             |             |
| LHX8         | ENSG00000162624  | 1  | 75584119  | 75637218  | 47   | 7   | 123834 | 1.6746 | 0.047005 | 0.80729088  |             |             |
| ESYT3        | ENSG00000158220  | 3  | 138143428 | 138210528 |      |     | 75     | 10     | 123834   | 1.6745      | 0.047018    | 0.80729088  |
| ALDH16A1     | ENSG00000161618  | 19 | 49946426  | 49984305  | 62   | 6   | 123834 | 1.6741 | 0.047055 | 0.80729088  |             |             |
| NDUF5        | ENSG00000168653  | 1  | 39481990  | 39510308  | 88   | 6   | 123834 | 1.6741 | 0.047058 | 0.80729088  |             |             |
| FEM1A        | ENSG00000141965  | 19 | 4781728   | 4805571   | 30   | 8   | 123834 | 1.673  | 0.047168 | 0.80729088  |             |             |
| SMAD5        | ENSG00000113658  | 5  | 135458534 | 135534435 |      |     | 141    | 3      | 123834   | 1.6727      | 0.04719     | 0.80729088  |
| ADM5         | ENSG00000224420  | 19 | 50181921  | 50203832  | 14   | 3   | 123834 | 1.6727 | 0.047192 | 0.80729088  |             |             |
| SI00A6       | ENSG00000197956  | 1  | 153497075 | 153518720 |      |     | 14     | 2      | 123834   | 1.6712      | 0.047338    | 0.80729088  |
| DHRS1        | ENSG00000157379  | 14 | 24749804  | 24779039  | 68   | 8   | 123834 | 1.6712 | 0.047344 | 0.80729088  |             |             |
| ECHDC2       | ENSG00000121310  | 1  | 53351656  | 53402884  | 37   | 5   | 123834 | 1.6711 | 0.047349 | 0.80729088  |             |             |
| FASTKD5      | ENSG00000215251  | 20 | 3117165   | 3150543   | 35   | 7   | 123834 | 1.6709 | 0.047369 | 0.80729088  |             |             |
| CD160        | ENSG00000117281  | 1  | 145685798 | 145725614 |      |     | 24     | 3      | 123834   | 1.6708      | 0.047385    | 0.80729088  |
| ARMC2        | ENSG00000118690  | 6  | 109159619 | 109305186 |      |     | 226    | 19     | 123834   | 1.6705      | 0.047405    | 0.80729088  |
| AC003005.4   | ENSG00000268107  | 19 | 57989086  | 58026749  | 154  |     | 6      | 123834 | 1.6702   | 0.047435    | 0.80729088  |             |
| TMEM184B     | ENSG00000198792  | 22 | 38605298  | 38679040  | 83   | 10  | 123834 | 1.6693 | 0.047525 | 0.80729088  |             |             |
| RP11-986E7.7 | ENSG00000273259  | 14 | 95048395  | 95100983  | 139  |     | 20     | 123834 | 1.6689   | 0.047573    | 0.80729088  |             |
| GD8          | ENSG00000101193  | 20 | 61559471  | 61586996  | 49   | 9   | 123834 | 1.6688 | 0.04758  | 0.80729088  |             |             |
| CACNG4       | ENSG00000075461  | 17 | 64951026  | 65039514  | 114  | 19  | 123834 | 1.6687 | 0.047589 | 0.80729088  |             |             |
| EPC1         | ENSG00000120616  | 10 | 32546679  | 32677726  | 195  | 12  | 123834 | 1.6679 | 0.047665 | 0.80729088  |             |             |
| PTPRQ        | ENSG00000139304  | 12 | 80789774  | 81082802  | 607  | 42  | 123834 | 1.6678 | 0.047674 | 0.80729088  |             |             |
| SPZ1         | ENSG00000164299  | 5  | 79605444  | 79627661  | 85   | 11  | 123834 | 1.6678 | 0.047682 | 0.80729088  |             |             |
| MRPL20       | ENSG00000242485  | 1  | 1327288   | 1352693   | 30   | 4   | 123834 | 1.6675 | 0.04771  | 0.80729088  |             |             |
| SSBP4        | ENSG00000130511  | 19 | 18519674  | 18555372  | 29   | 3   | 123834 | 1.6673 | 0.047731 | 0.80729088  |             |             |
| ATP6V1G1     | ENSG00000136888  | 9  | 117340026 | 117370653 |      |     | 66     | 9      | 123834   | 1.6668      | 0.047777    | 0.80729088  |
| BCL2L12      | ENSG00000126453  | 19 | 50158823  | 50187173  | 11   | 2   | 123834 | 1.6668 | 0.04778  | 0.80729088  |             |             |
| NPAS3        | ENSG00000151322  | 14 | 33394139  | 34283382  | 1040 | 152 | 123834 | 1.665  | 0.047959 | 0.808996657 |             |             |
| ZBTB12       | ENSG00000204366  | 6  | 31857384  | 31879769  | 33   | 12  | 123834 | 1.6644 | 0.048018 | 0.808996657 |             |             |
| NPHP1        | ENSG00000144061  | 2  | 110869888 | 110972643 |      |     | 106    | 6      | 123834   | 1.6635      | 0.048105    | 0.808996657 |
| E4F1         | ENSG00000167967  | 16 | 2263567   | 2295743   | 23   | 4   | 123834 | 1.6631 | 0.048144 | 0.808996657 |             |             |
| TRIM72       | ENSG00000177238  | 16 | 31215342  | 31246510  | 3    | 1   | 123834 | 1.663  | 0.048161 | 0.808996657 |             |             |
| ERCC8        | ENSG00000049167  | 5  | 60159658  | 60250900  | 180  | 14  | 123834 | 1.6621 | 0.048247 | 0.808996657 |             |             |
| WBSR17       | ENSG00000185274  | 7  | 70587155  | 71188585  | 1266 | 103 | 123834 | 1.6621 | 0.048248 | 0.808996657 |             |             |
| ACMSD        | ENSG00000153086  | 2  | 135586117 | 135669604 |      |     | 101    | 5      | 123834   | 1.6618      | 0.048272    | 0.808996657 |
| PSMD4        | ENSG00000159352  | 1  | 151217179 | 151249955 |      |     | 25     | 3      | 123834   | 1.6611      | 0.048343    | 0.808996657 |
| ACOXL        | ENSG00000153093  | 2  | 111480150 | 111885799 |      |     | 682    | 44     | 123834   | 1.6604      | 0.048422    | 0.808996657 |
| SULT1A1      | ENSG00000196502  | 16 | 28606903  | 28644946  | 16   | 2   | 123834 | 1.6599 | 0.048465 | 0.808996657 |             |             |
| ZBTB20       | ENSG00000181722  | 3  | 114046941 | 114876118 |      |     | 823    | 55     | 123834   | 1.6597      | 0.04849     | 0.808996657 |
| MSH5         | ENSG00000204410  | 6  | 31697725  | 31742622  | 47   | 13  | 123834 | 1.6594 | 0.048515 | 0.808996657 |             |             |
| MSH5-SAPCD1  | ENSG00000255152  | 6  | 31697797  | 31742628  | 47   | 13  | 123834 | 1.6594 | 0.048515 | 0.808996657 |             |             |
| RBAK         | ENSG00000146587  | 7  | 5075452   | 5119119   | 114  | 13  | 123834 | 1.6591 | 0.048544 | 0.808996657 |             |             |
| SYNE3        | ENSG00000176438  | 14 | 95873831  | 95952173  | 146  | 28  | 123834 | 1.6581 | 0.048651 | 0.808996657 |             |             |
| NDUFS7       | ENSG00000115286  | 19 | 1373526   | 1405583   | 30   | 5   | 123834 | 1.6579 | 0.048669 | 0.808996657 |             |             |
| CISD2        | ENSG00000145354  | 4  | 103780135 | 103820399 |      |     | 55     | 3      | 123834   | 1.6562      | 0.048839    | 0.808996657 |
| RBBP5        | ENSG00000117222  | 1  | 205045270 | 205101143 |      |     | 127    | 13     | 123834   | 1.656       | 0.048865    | 0.808996657 |
| SRRT         | ENSG000000087087 | 7  | 100462733 | 100496285 |      |     | 40     | 5      | 123834   | 1.6558      | 0.048886    | 0.808996657 |
| PNMA2        | ENSG00000204064  | 8  | 26352202  | 26381608  | 88   | 13  | 123834 | 1.6543 | 0.049036 | 0.808996657 |             |             |
| FCN3         | ENSG00000142748  | 1  | 27685603  | 27711315  | 15   | 4   | 123834 | 1.6539 | 0.049073 | 0.808996657 |             |             |
| AL645922.1   | ENSG00000268923  | 6  | 31963945  | 31984881  | 2    |     | 1      | 123834 | 1.6536   | 0.049105    | 0.808996657 |             |
| FILOT2       | ENSG00000132589  | 17 | 27196353  | 27234697  | 22   | 6   | 123834 | 1.653  | 0.049168 | 0.808996657 |             |             |
| TMEM182      | ENSG00000170417  | 2  | 103343367 | 103470352 |      |     | 154    | 9      | 123834   | 1.6525      | 0.049214    | 0.808996657 |
| TNFAIP6      | ENSG00000123610  | 2  | 152204106 | 152246560 |      |     | 76     | 8      | 123834   | 1.651       | 0.049369    | 0.808996657 |
| SLC17A7      | ENSG00000104888  | 19 | 49922658  | 49955617  | 25   | 3   | 123834 | 1.651  | 0.049374 | 0.808996657 |             |             |
| PLCB2        | ENSG00000137841  | 15 | 40560377  | 40610136  | 26   | 8   | 123834 | 1.6507 | 0.049403 | 0.808996657 |             |             |
| ACPP         | ENSG000000014257 | 3  | 132026211 | 132097142 |      |     | 167    | 15     | 123834   | 1.6506      | 0.049414    | 0.808996657 |
| GAMT         | ENSG00000130005  | 19 | 1387091   | 1411569   | 29   | 5   | 123834 | 1.6504 | 0.049429 | 0.808996657 |             |             |
| FSIP1        | ENSG00000150667  | 15 | 39882232  | 40085031  | 318  | 17  | 123834 | 1.6503 | 0.049438 | 0.808996657 |             |             |
| KIAA1199     | ENSG00000103888  | 15 | 81061684  | 81254117  | 121  | 28  | 123834 | 1.6502 | 0.049456 | 0.808996657 |             |             |
| APOA4        | ENSG00000110244  | 11 | 116681419 | 116704022 |      |     | 46     | 10     | 123834   | 1.6501      | 0.049464    | 0.808996657 |
| Clorf167     | ENSG00000215910  | 1  | 11811844  | 11859642  | 136  | 10  | 123834 | 1.6499 | 0.049478 | 0.808996657 |             |             |
| SAPCD1       | ENSG00000228727  | 6  | 31720576  | 31742628  | 21   | 8   | 123834 | 1.6493 | 0.049543 | 0.808996657 |             |             |
| CST8         | ENSG00000125815  | 20 | 23461738  | 23486655  | 47   | 8   | 123834 | 1.6489 | 0.049585 | 0.808996657 |             |             |
| WT1          | ENSG00000184937  | 11 | 32399321  | 32467176  | 178  | 18  | 123834 | 1.6487 | 0.04961  | 0.808996657 |             |             |
| PRKAR2A      | ENSG00000114302  | 3  | 48772030  | 48895279  | 59   | 5   | 123834 | 1.6485 | 0.049624 | 0.808996657 |             |             |
| DCDC2C       | ENSG00000214866  | 2  | 3741453   | 3846122   | 166  | 22  | 123834 | 1.6484 | 0.04964  | 0.808996657 |             |             |
| RAB40C       | ENSG00000197562  | 16 | 629357    | 689272    | 133  | 7   | 123834 | 1.6483 | 0.049642 | 0.808996657 |             |             |
| CLEC4A       | ENSG00000111729  | 12 | 8266228   | 8301203   | 26   | 5   | 123834 | 1.6472 | 0.049756 | 0.808996657 |             |             |
| TTK          | ENSG00000112742  | 6  | 80703604  | 80762244  | 177  | 8   | 123834 | 1.6472 | 0.049757 | 0.808996657 |             |             |
| NFATC2IP     | ENSG00000176953  | 16 | 28952128  | 28988418  | 19   | 2   | 123834 | 1.6471 | 0.049765 | 0.808996657 |             |             |
| STK16        | ENSG00000115661  | 2  | 220100177 | 220125059 |      |     | 26     | 4      | 123834   | 1.6455      | 0.049932    | 0.808996657 |
| DPT          | ENSG00000143196  | 1  | 168654697 | 168708502 |      |     | 159    | 21     | 123834   | 1.6454      | 0.049946    | 0.808996657 |
| FUS          | ENSG000000089280 | 16 | 31181431  | 31213127  | 4    | 1   | 123834 | 1.6452 | 0.04996  | 0.808996657 |             |             |
| ALAD         | ENSG00000148218  | 9  | 116138597 | 116173613 |      |     | 31     | 6      | 123834   | 1.6451      | 0.049977    | 0.808996657 |
| UQCRI1       | ENSG00000127540  | 19 | 1587171   | 1615480   | 7    | 2   | 123834 | 1.645  | 0.049983 | 0.808996657 |             |             |
| SERPINE2     | ENSG00000135919  | 2  | 224829829 | 224914036 |      |     | 133    | 17     | 123834   | 1.645       | 0.049987    | 0.808996657 |
| C12orf61     | ENSG00000221949  | 12 | 62985531  | 63007214  | 31   | 7   | 123834 | 1.6448 | 0.050009 | 0.808996657 |             |             |
| AES          | ENSG00000104964  | 19 | 3042908   | 3073105   | 6    | 3   | 123834 | 1.642  | 0.050298 | 0.812979918 |             |             |
| C20orf112    | ENSG00000197183  | 20 | 31020862  | 31182876  | 148  |     | 14     | 123834 | 1.6405   | 0.050445    | 0.813628873 |             |
| CSRP1        | ENSG00000159176  | 1  | 201442658 | 201488584 |      |     |        |        |          |             |             |             |
